# Supplementary material for: Genetic analysis of rice seedling traits related to machine transplanting under different seeding densities
Source: Research Square preprint supplement (doi:10.21203/rs.3.rs-51674/v3), 2020-11-10
Supplement: Supplementary file 1 [file ca1d2409d5b250fb325b2ac5.xlsx]

## Sheet: Ex1
Table S2. Phenotypic variation of the RIL population of 9311/Nipponbare cross among three seeding densities. SH, seedling height (cm); FLSL, first leaf sheath length (cm); FLL, first leaf length (cm); SLL, second leaf length (cm); SDW, shoot dry weight (mg); RDW, root dry weight (mg).
RIL	SH/LD	SH/MD	SH/HD	FLSL/LD	FLSL/MD	FLSL/HD	FLL/LD	FLL/MD	FLL/HD	SLL/LD	SLL/MD	SLL/HD	RDW/LD	RDW/MD	RDW/HD	SDW/LD	SDW/MD	SDW/HD
F001	20.75	23.92	23.81	5.9	6.47	6.21	4.07	3.64	4	15.11	16.65	15.95	7	5.8	2.8	19	18.2	15
F002	25.39	27.02	27.65	4.71	5.33	6.01	3.05	3.05	3.65	11.77	13	17.03	7.2	3.6	3.1	27.1	22.4	15.3
F003	25.34	26.09	28.61	4.17	4.3	4.52	2.94	3.21	3.6	11.97	12.5	11.49	12.2	8	8.1	22.4	18.8	16.6
F004	23.38	22.48	27.53	3.65	3.71	3.85	3.32	3.41	3.55	10.26	9.48	10.61	12.6	7.5	3.8	31.2	22.5	20.9
F005	25.74	27.76	25.68	3.88	3.97	3.92	3.42	2.96	3.67	10.59	10.05	11.47	11.8	8.8	5.6	29.2	27	17.5
F006	25.01	25.87	28.99	3.93	4.43	5.23	1.2	1.34	1.49	8.6	9.11	10.59	8.4	4.6	4.9	28.1	23.8	16.5
F007	24.22	23.39	24.29	4.84	4.92	5.49	3.19	2.95	3.68	12.72	12.65	13.9	14.1	6.7	5.4	29.4	21.3	20.1
F008	15.31	14.54	12.59	3.77	3.53	3.35	1.98	1.65	1.58	7.17	6.22	6.11	5.8	3.1	2.8	20.7	16.7	10.9
F009	25.37	26.79	26.45	4.61	4.73	4.44	2.27	2.55	2.92	10.55	11.08	10.83	11	10.9	8.9	25.3	22.9	23.5
F010	22.95	23.29	23.97	3.94	4.37	4.39	2.36	2.49	2.28	9.48	10.85	10.41	12.5	7.3	6.4	32.5	24.1	21.8
F011	20	18.41	18.35	3.65	3.16	3.21	1.43	2.24	1.37	6.24	5.83	5.27	11.6	8.8	6.7	28.7	19.4	14.7
F012	23.47	24.19	21.59	4.64	5.75	5.34	3.78	3.93	3.85	10.8	13.98	13.31	7.5	5.8	4.5	28	21.3	14.7
F013	19.5	22.89	22.45	4.07	3.89	3.92	3.39	3.05	3.15	10.48	9.39	9.89	7.9	6.7	3.5	21.1	18	13.2
F014	19.81	20.19	20.91	3.09	3.2	5.11	1.51	1.59	4.97	5.46	6.03	11.14	10.8	6.8	4.2	27.1	17.2	11.5
F015	20.33	20.41	21.9	5.12	5.22	5.08	4.59	4.71	5.04	13.78	13.52	13.93	7.3	6.4	4.7	18.5	16.2	19.7
F016	22.89	25.59	27.83	3.77	5.05	5.65	2.39	2.82	2.95	9.29	12.33	13.77	10.4	7	3.9	29.6	19.4	16.1
F017	21.12	22.56	22.22	4.29	4.39	4.67	3.46	3.11	3.49	11.63	11.13	12.43	12	8.6	5.5	27	22.8	19.8
F018	23.34	24.97	24.82	5.13	4.96	4.93	3.21	3.04	3.03	13.61	13.48	13.48	7.4	5.4	4.7	29.1	19.5	16.7
F019	17.73	18.03	18.43	3.93	3.79	3.81	2.71	3.03	2.75	9.79	9.94	9.79	9.5	5.2	4.9	26.6	17.2	13.5
F020	25.07	25.63	25.61	4.49	5.87	6.15	3.1	4	4.06	10.51	14.91	15.65	12.7	9.8	7.7	28.2	22.4	16.4
F021	17.01	17.31	18.53	3.48	3.9	3.36	2.51	2.89	2.91	7.87	8.43	8.37	9.4	6.5	3.8	24	20.9	19.3
F022	20.72	22.93	23.22	4.47	4.81	4.37	1.6	1.73	1.45	7.93	8.99	8.33	6	3.9	3.3	30.2	18.3	15.3
F023	21.63	25.5	23.27	4.52	5.2	4.45	3.2	3.69	4.37	11.15	13.64	11.23	6.7	6.6	6.2	28.2	25.8	21.1
F024	22.17	18.79	23.08	4.43	4.95	3.93	1.71	2.27	1.72	8.96	10.51	8.29	9.2	4.6	2.9	34.7	20.2	14.7
F025	16.87	17.5	20.21	4.1	4.05	3.85	2.25	2.41	2.07	9.06	8.86	9.75	8.5	6.1	5	16.4	12.1	9.7
F026	15.27	15.93	16.91	3.85	3.98	4.24	2.51	3.14	2.97	8.17	9.05	9.65	10.1	4.2	4.3	29.4	15.2	12.9
F027	19.35	19.79	21.03	4.33	4.23	4.83	2.96	3.09	3.16	11.78	11.5	12.93	14.4	8.5	5.9	31	22.5	20.9
F028	23.13	25.07	27.07	4.13	4.87	4.73	3.64	2.95	2.71	10.33	11.82	12.61	9.1	5.4	4.5	35.7	25.9	20.8
F029	15.78	19.67	19.05	2.92	3.96	4.39	1.97	2.7	6.04	6.75	10.73	11.07	11.8	7	3.2	21.1	20.9	17.9
F030	20.05	22.77	20.98	3.35	4.05	4.03	2.01	2.54	2.93	8.03	10.47	10.47	12.2	4.9	5.7	30.6	26.1	20.4
F031	19.13	19.31	20.01	2.76	2.67	3.81	2.81	1.93	2.83	6.12	4.71	9.27	13.8	9.1	6.3	34.5	17.6	13.1
F032	19.22	19.08	21.67	3.39	3.87	4.09	2.03	2.55	2.93	7.63	9.98	11.02	9	4.8	5.7	24.2	16	17
F033	17.61	22.05	22.25	2.4	2.91	3.66	3.49	2.52	2.88	5.79	7.7	9.63	11.8	10.4	9.6	26.2	24.9	23
F034	21.89	23.95	24.41	3.85	4.65	4.03	2.65	3.6	2.65	8.98	11.3	9.95	10.2	4.8	3.9	26.3	17	18.4
F035	19.55	22.65	22.54	2.87	3.16	4.16	2.11	2.35	3.57	7.25	8.16	11.33	12.3	12.5	5.8	24.4	25.3	15.9
F036	14.83	15.8	15.49	2.46	2.69	2.44	1.41	1.87	1.39	5.02	6.33	4.72	9	5.8	5.3	33.5	23	17.5
F037	26.66	25.74	28.4	4.71	3.95	4.48	2.15	1.84	2.37	7.88	8.25	10.22	21.8	16.3	11.7	38.7	34.4	24.6
F038	20.58	23.6	24.83	4.38	4.69	4.23	2.33	2.31	2.44	8.98	9.61	8.89	8.2	5	4.3	28	19.3	16.7
F039	23.27	21.73	23.44	4.14	3.73	4.6	2.14	1.42	3.78	9.32	7.59	11.25	10	5.6	5.4	28.2	18.2	15.7
F040	15.41	16.58	18.06	3.55	3.97	3.06	3.17	3.41	2.49	9.47	9.54	9.09	15.5	8.5	6.7	28.4	21.1	16.2
F041	20.24	23.43	22.35	3.72	4.32	4.24	3.26	3.48	3.68	11.06	12.15	11.86	7.3	5.9	5.6	28.4	20.2	15.8
F042	21.27	22.49	22.14	4.63	4.89	4.75	3.29	3.77	3.37	11.46	12.41	11.31	7.6	3.7	3.4	28.8	25.6	18.4
F043	23.89	27.03	25.61	3.85	3.55	3.81	1.77	1.61	1.67	7.03	6.65	6.69	8.5	5.5	4.9	23.6	20.8	18.5
F044	17.47	19.24	19.41	3.56	4.47	4.62	2.04	2.29	2.31	7.03	7.9	9.39	8.7	3.4	3.5	23.8	12.6	11.6
F045	15.69	17.33	20.24	2.91	3.73	4.45	2.29	2.75	3.49	7.28	9.44	11.57	10.5	5.2	3.3	23.7	18.1	12.1
F046	17.69	16.85	17.83	2.83	3.34	3.23	1.87	2.5	2.22	7.35	8.09	7.88	12.6	5.4	5.8	22	18.8	18.9
F047	15.77	17.59	17.9	3.15	3.56	3.75	2.19	2.86	2.53	7.31	8.48	8.89	9.7	7.4	6.8	15.7	16	15.3
F048	21.87	24.4	25.09	3.42	4.97	4.23	2.76	3.01	2.94	13.03	10.93	10.02	7.4	4.3	3.6	28.7	21.6	15
F049	18.71	19.89	19.85	3.61	3.41	3.35	2.33	2.46	2.39	11.97	7.25	6.42	15.4	10	10.1	29.7	21.5	19.4
F050	20.74	22.42	20.77	3.61	4.71	4.89	2.95	3.38	3.59	9.13	10.89	12.14	6.6	5.5	3.9	30	19.5	15.4
F051	18.91	19.15	17.14	3.1	3.18	2.81	1.59	1.84	1.65	6.62	7.47	6.45	11	9.7	6.6	25.9	24.1	21.6
F052	23.35	25.49	25.94	4.55	5.13	4.41	2.13	2.71	2.31	9.63	11.07	9.29	9.7	7	6.9	30.4	22.8	23.6
F053	14.45	15.09	16.33	2.39	2.57	2.78	1.71	1.65	1.63	5.92	6.36	7.15	16.5	11	9.6	31	20	19
F054	22.81	23.93	22.09	4.13	5.4	5.6	4.19	4.78	4.46	11.41	13.8	13.99	6.7	4.9	3.5	34.1	26.2	19.3
F055	16.39	17.19	19.46	3.01	3.01	2.99	2.78	2.47	2.43	7.15	7.21	6.76	14.6	14.2	5.9	26.6	30.3	15.2
F056	24.32	25.33	22.41	4.03	5.59	5.49	2.95	4.39	4.32	10.23	14.66	14.62	10.7	5.3	4.7	33.5	23.2	15.8
F057	14.51	14.8	15.14	3.93	2.26	2.11	3.76	1.37	1.17	7.48	4.65	3.03	10.7	5.8	5	23.8	20.5	14.9
F058	20.63	19.43	21.11	4.02	3.71	3.95	2.1	2.32	2.59	8.6	8.49	8.71	11.5	5.8	5.6	30.4	26.2	24.2
F059	19.17	18.71	20.28	3.88	4.21	4.96	3.05	3.2	3.65	10.69	10.29	12.73	6.9	5	2.5	24.1	15.5	18.1
F060	20.57	23.52	24.97	4.19	4.87	4.15	3.32	3.95	3.17	11.25	12.87	11.39	8.7	7	4	23.6	21.6	20.2
F061	15.25	19.33	21.29	2.44	3.99	4.29	1.07	1.87	2.41	4.65	6.85	8.04	7.2	6	3.4	20.2	17.3	20.3
F062	23.99	23.81	24.36	5.41	5.39	5.75	5.29	4.42	4.96	15.39	15.19	15.31	8	5.1	3.7	31.2	28	19.9
F063	18.44	19.97	20.55	3.17	3.65	3.31	2.06	2.1	2.19	7.12	7.05	7.81	9.7	7.8	7	26	19.2	20.5
F064	23.99	27.53	27.68	4.61	4.85	4.83	1.61	1.77	4.45	10.2	10.54	10.8	6	5.3	4.6	26	23.2	24.2
F065	15.03	16.25	17.26	3.49	3.33	3.13	3.04	2.63	2.46	9.41	9.17	8.51	14.3	9.6	6.1	25.3	17.9	17.9
F066	23.21	24.14	25.81	4.32	4.66	4.43	2.01	2.55	2.31	9.78	10.86	10.51	8.3	4.5	3.6	33.9	18.6	20.6
F067	20.72	22.41	22.58	3.66	3.93	3.88	4.31	2.77	2.49	10.67	10.53	9.77	17.4	8.5	5.6	26	23.2	20.8
F068	19.46	21.28	24.07	3.28	3.98	3.87	2.01	2.43	2.13	8.55	9.56	9.86	10.9	6.7	5.7	33.3	23.5	26
F069	16.41	16.03	16.79	2.74	3.63	3.86	1.18	2.07	3.21	4.05	5.86	6.11	14.3	8.6	7	25	24.3	21
F070	15.27	16.38	17.19	3.1	3.69	3.91	1.77	2.53	2.99	9.09	10.01	10.34	8.9	6.2	5.1	28.1	19.7	17.4
F071	18.54	17.7	21.49	4.49	4.13	4.65	3.71	2.96	3.77	11.06	9.87	11.11	9.2	8.1	5.5	30.8	31.9	23.3
F072	16.09	16.86	16.18	3.77	3.33	3.97	2.35	2.39	2.49	9.99	9.93	9.32	9.4	6.2	6	30	21	16.2
F073	11.91	11.35	14.34	2.38	2.43	2.66	1.6	1.61	2.02	5	5.33	6.04	14.3	6.9	4.4	23.1	16.8	17.3
F074	17.89	17.55	16.85	2.51	3.33	3.31	1.67	2.3	2.45	4.36	7.91	7.77	11.6	7.8	11	29.3	18.4	27.3
F075	15.01	15.92	18.09	2.16	2.41	2.62	1.52	1.81	2.24	5.15	7.77	5.77	19.9	9.4	9.6	28.4	21.3	21.1
F076	18.87	19.56	20.19	2.33	3.21	3.6	1.71	3.08	2.28	4.6	6.97	8.54	16.4	15	9.6	35	34.6	30.6
F077	16.04	18.19	19.5	2.93	3.25	4.23	2.19	3.37	3.5	6.51	7.09	10.62	12	9	7.1	18.9	18.5	17.4
F078	16.11	18.42	17.86	3.51	4.15	4.5	2.62	3.15	3.34	7.75	9.61	10.53	7.4	5.6	3	18.8	18.3	14.3
F079	17.83	18.93	18.58	3.53	3.93	4.05	2.94	3.49	5.33	9.71	11.87	11.33	11.2	5.2	7.5	27.9	18.1	23.8
F080	14.8	16.24	18.25	2.97	3.07	3.56	1.53	2.99	2.31	5.59	7.09	8.18	10.8	7.5	6.5	24.7	20.3	17.6
F081	16.44	15.49	15.61	3.53	3.33	3.38	1.95	2.01	1.96	6.88	7.64	7.95	11.7	11	10.2	25.2	20.7	21
F082	18.03	16.34	17.63	2.13	1.71	2.76	1.52	1.28	2.23	4.69	3.8	6.93	18.3	14.2	12.9	38.6	30	26
F083	17.09	17.14	17.51	3.93	4.44	4.3	3.43	3.69	4.34	10.13	10.74	10.29	9.7	8.7	5.5	25.9	20.6	17.8
F084	14.03	14.65	15.47	3.11	3.13	2.94	1.91	2.27	1.94	7.13	6.95	7.01	6.5	4	4	12.7	14.4	11.6
F085	16.21	17.24	19.69	5.5	3.01	4.19	2.33	2.02	2.97	8.47	9.35	11.88	10.7	6.6	3.1	26.4	18.3	16.4
F086	17.92	20.33	19.43	2.8	3.35	4.13	1.47	2.77	1.98	5.25	6.33	7.76	12.1	9.8	5.4	30.7	23.9	14.8
F087	16.29	17.04	19.45	3.11	3.79	4.08	1.56	2.17	2.38	6.51	8.15	9.49	9.7	4.5	3.5	20.6	20.4	15.8
F088	16.96	17.43	20.23	3.6	3.49	4.55	2.76	2.71	3.57	9.37	8.33	12.78	11.4	10	7.1	27.9	20.3	25
F089	24.74	23.46	25.59	4	4.05	4.35	2.46	2.3	2.64	8.89	8.46	9.54	14.1	13.6	11.5	23.4	27.9	24.4
F090	13.87	21.15	17.3	3.21	3.46	4.05	2.17	1.65	2.56	7.51	7.01	9.12	12.1	8.2	5.4	22.2	15.9	18.6
F091	18.73	18.3	17.89	2.87	2.69	3.15	1.45	1.5	1.59	5.31	4.87	5.19	9.6	8.6	6.5	26	22.7	22.4
F092	22.5	26.04	23.04	4.79	5.31	5.63	2.75	3.42	3.39	11.1	13.04	12.58	8.2	4.8	5.4	26.6	25.4	18.3
F093	19.25	18.89	21.09	3.81	4.33	4.8	3.05	3.84	4.29	9.61	11.59	12.21	17.7	12.1	8.1	30.8	24.6	32.9
F094	19.74	20.58	21.42	3.57	3.75	3.95	1.59	1.71	1.89	6.79	7.2	7.59	11.5	8.4	4.4	32	26.1	17.7
F095	14.27	17.15	17.23	3.4	3.95	4.03	3.21	3.87	3.89	8.67	10.47	11.17	10.9	10.9	7.9	36.1	28.9	27.3
F096	15.45	17.58	17.85	2.8	3.05	3.37	2.68	2.91	3.03	7.25	7.34	8.33	10.3	14.7	7.5	20.3	23.5	19.5
F097	19.57	21.4	22.05	3.75	4.27	3.87	2.23	2.61	2.32	8.32	10.27	10.13	13.1	7	5.1	34.6	18.9	20.7
F098	20.48	24.8	28.31	3.71	4.31	4.79	2.16	2.46	2.8	9.09	11.15	11.61	8.7	3.6	4.3	32.8	26.3	20.4
F099	17.33	19.54	22.32	3.17	3.09	3.5	2.23	1.99	2.25	8.55	8.08	9.25	11.8	5.1	9.9	28.8	23.2	28.6
F100	19.43	21.59	21.4	3.58	3.98	4.81	2.73	2.55	3.32	9.79	11.21	12.82	8.6	6.6	2.6	26.3	24	16.1
F101	13.43	14.61	17.71	3.21	3.82	3.95	2	2.51	2.66	7.08	13.35	8.59	10.8	4.3	6.1	20.6	16.8	18.6
F102	17.52	18.3	18.21	5.43	3.91	3.96	1.85	1.88	2.71	6.87	7.87	8.52	9.2	6.1	2	23.7	19.2	15.5
F103	13.07	14.01	13.45	2.51	2.75	2.57	1.9	2.12	2.29	5.03	5.39	5.72	11	7.5	6.1	19	19.8	18.3
F104	27.37	26.46	31.94	5.15	5.68	6.32	3.12	3.27	4.23	11.18	13.08	14.1	10.8	4.8	3.4	41.2	18.3	22.2
F105	16.59	14.99	18.72	3.37	3.47	3.55	2.81	2.57	3.03	8.97	7.3	7.95	15.6	10.8	10.2	35.2	23.2	29
F106	16.39	16.21	15.55	4.17	4.03	3.02	3.19	2.89	3.6	9	9.4	6.99	7.8	5.2	6.7	28.4	20.6	18.3
F107	16.12	17.69	19.41	3.6	4.59	4.78	2.85	4.2	4.2	9.21	12.12	12.07	9.8	6.4	6.3	26.1	21.5	18.9
F108	13.91	14.99	15.57	3.02	2.22	2.72	1.55	3.46	1.06	5.97	6.35	4.83	7.5	6.2	6.5	19.6	15.7	12.1
F109	16.99	16.69	18.94	3.79	3.55	3.75	2.66	2.47	2.69	9.2	8.22	9.16	9.7	6.9	4.9	30.5	21.6	21.3
F110	16.87	16.47	17.77	3.11	3.19	3.78	1.89	1.92	3.81	7.47	8.06	9.64	8.8	6.1	4.8	34.2	16.6	17
F111	17.14	19.63	20.83	3.57	3.8	4.75	2.45	2.55	3.17	7.86	9.29	11.95	12.6	6.9	3.9	23.6	16.3	14.6
F112	15.99	18.68	20.3	3.27	4.7	4.5	2.37	3.86	2.9	7.48	12.15	11.05	9.6	6.1	4.3	27.2	20	13.9
F113	24.07	27.33	28.25	4.83	5.04	5.57	3.41	3.45	3.5	10.99	12.95	14.22	9.4	3.7	4.5	40.1	18.9	20.6
F114	19.67	21.16	21.3	3.69	4.16	4.68	1.91	1.88	2.35	7.44	8.59	10.45	10.8	5.6	5.9	30.3	20.1	16.4
F115	18.95	20.86	21.66	3.76	4.17	4.65	3.39	3.61	3.53	9.93	10.99	11.06	8	3	4.2	27.3	19.9	17.3
F116	16.37	18.82	19.21	2.85	3.61	5.85	1.24	1.07	5.17	4.08	5.84	9.67	9.6	3.3	4.7	20	16.8	11.8
F117	20.76	22.07	24.31	4.43	4.47	4.54	3.93	3.75	4.33	11.78	12.31	12.43	6.6	5.4	4	25.8	27.6	22.2
F118	19.77	19.83	21.35	4.35	3.91	4.69	5.32	4.51	6.01	10.58	10	11.73	6.6	3.7	4	26.5	23.8	17.3
F119	15.01	17.16	17.58	3.29	4.09	4.33	2.71	3.85	3.85	8.43	10.7	10.99	5.5	3.9	3.5	24.4	15	16.1
F120	24.83	27.02	27.39	4.99	5.52	6.63	3.37	3.51	4.73	11.69	12.91	15.21	6	4.9	4	39.5	37.4	22.4
F121	16.2	17.91	19.3	3.47	4.02	4.21	2.77	3.15	3.3	10.45	10.39	11.69	10.6	6.9	3.5	27.8	15.1	14.6
F122	21.34	25.35	26.19	4.69	4.03	4.53	4.46	4.17	4.59	12.5	11.77	13.29	11.6	7.1	5.4	39.4	30.3	23.7
F123	15.86	26.81	14.51	3.85	3.84	3.93	3.02	2.81	2.33	8.64	8.36	8.66	10.4	7.8	3.5	26.2	18.1	13
F124	17.2	17.17	18.52	6.89	4.14	4.63	3.57	3.19	4.15	11.18	9.99	11.73	8.6	6.6	4.8	39	33.3	18.7
F125	14.58	14.69	16.76	3.3	3.13	3.45	1.5	2.02	2.21	6.58	7.4	7.29	13.6	6.1	2.5	27.6	21.3	14
F126	20.67	19.98	23.24	4.01	4.11	5.11	3.01	2.79	3.42	9.64	9.66	11.75	5.8	4.7	4.2	30.7	23.5	21.5
F127	17.59	17.25	17.77	4.18	4.31	4.76	1.99	2.21	2.39	8.33	9.45	10.25	10.5	8.1	4.2	28.7	23.3	16.5
F128	19.83	22.57	22.75	4.77	5.24	5.13	3.1	3.07	3.01	10.77	11.91	12.5	11.2	6.5	3.6	32	24.3	20.9
F129	22	18.38	17.81	4.46	4.37	4.44	2.85	2.71	3.07	10.65	10.44	11.33	8.3	7.2	3.8	35.1	26.4	22.5
F130	16.76	15.94	17.2	4.67	4.04	4.41	5.33	4.09	5.47	11.14	14.64	11.06	14.5	8.5	6.1	33.3	22.2	19.6
F131	19.23	18.59	21.45	3.39	3.46	3.96	1.68	1.67	2.09	6.86	7.09	8.19	8.6	6.1	4.9	32.6	17	16.8
F132	22.67	23.41	22.28	4.67	4.53	4.77	5.51	5.02	5.17	13.72	13.38	12.75	10.7	6.8	4.4	33.6	22.4	14.8
F133	17.82	17.61	19.59	3.27	3.67	3.67	1.63	1.84	1.7	5.95	7.07	6.85	9.9	8.4	2.9	26.8	21.1	16.5
F134	15.13	16.74	17.7	3.58	4.13	4.35	4.29	4.8	5.54	9.74	11.42	11.47	9.2	5.6	5.6	22.8	17.7	17.5
F135	18.33	16.9	18.62	3.68	4.05	4.42	2.81	3.21	3.59	8.95	10.5	11.05	14.2	4.6	4.3	28.3	21	15
F136	12.78	13.97	14.89	2.68	3.26	3.79	2.55	3.6	3.79	6.65	9.44	9.38	12.9	7.1	3.4	21.8	17.9	14.4
F137	18.49	17.43	17.49	3.8	4.23	4.14	2.38	2.36	3.91	8.55	9.73	9.9	16.1	6.7	5.9	32.4	19.1	17.3
F138	18.59	20.14	21.22	4.03	4.06	5.65	3.14	2.67	4.14	10.45	9.5	12.67	9.9	5.1	4.2	25.5	17	12.2
F139	18.86	19.54	18.79	4.09	4.83	4.61	4.15	4.76	4.47	10.13	10.95	10.65	12.5	8	7.8	32.6	28.2	24.4
F140	14.29	18.08	19.99	3.79	4.17	4.73	2.21	2.23	3.01	7.63	10.56	11.62	8.6	6.7	3.3	19.1	17.8	14.9
F141	22.76	22.36	23.69	4.75	4.47	4.19	2.95	2.39	2.18	10.93	9.72	9.15	5.8	5.2	4.6	36.3	22.8	18.9
F142	17.93	23.8	24.97	3.99	4.37	4.93	2.68	2.43	2.71	7.07	8.31	8.43	7.1	6.1	5.4	19.3	21	15.1
F143	17.61	17.31	19.27	6.48	3.62	4.08	1.43	1.37	1.53	6.93	6.81	7.41	7.4	5.1	4.7	25.2	18.6	12.4
F144	15.53	19.31	21.86	3.95	4.94	4.95	2.4	3.29	3.1	8.28	10.49	10.35	9.6	8	5.8	26.5	21.7	19.6
F145	17.55	18.49	20.17	3.14	3.57	3.85	1.55	1.75	1.67	5.63	6.5	6.47	14.4	7.5	7.5	29.3	21.1	20.7
F146	13.03	16.55	20.85	3	3.65	3.72	1.69	2.3	2.31	6.76	7.95	7.66	13	6.3	3.5	21.8	14.3	15.2
F147	26.68	25.06	25.47	5.61	5.43	5.62	3.51	3.13	3.41	13.44	13.02	13.94	8.9	6	3.2	34.8	22	19.9
F148	18.17	21.06	19.99	3.77	4.23	3.98	2.63	2.75	2.82	9.29	10.11	9.53	10.3	6.8	5.9	28.3	13.5	17.8
F149	23.59	24.33	23.67	4.51	4.25	3.87	2.96	2.44	2.32	9.58	9.03	8.41	6.4	4.9	3.6	30.7	20.6	20.4
F150	13.21	14.21	13.05	3.65	3.87	3.83	2.98	3.31	3.27	8.55	8.67	8.23	12.9	8.3	7	23	18.8	14
F151	17.69	16.56	14.81	3.93	4.1	4.13	2.13	2.21	2.61	9.25	9.38	9.38	10.3	6.3	4.2	19.7	15.4	11.9
F152	17.02	17.99	17.91	4.14	4.33	4.65	2.41	2.87	3.17	9.65	10.38	10.65	11	4.2	4.5	23.2	19.3	13.9
F153	16.66	16.63	19.53	3.53	3.06	3.63	1.19	1.3	1.23	5.7	5.7	6.49	9.6	5.8	6.5	23.9	14.9	13.3
F154	12.09	15.7	16.36	2.97	3.75	5.25	1.97	2.79	2.53	5.56	8.23	8.01	10.7	5.5	4.3	19	10.1	10.8
F155	14.65	15.45	16.23	3.22	3.37	3.16	2.98	3.29	2.79	8.25	8.65	8.06	8.2	3.8	3.7	26.8	20.8	16.9
F156	15.69	16.79	19.09	3.61	4.12	3.95	2.2	2.4	2.38	7.91	9.13	8.99	12.6	8.3	5.3	22.7	16.8	18
F157	20.55	21.27	23.81	4.55	4.92	4.81	3.76	4.19	3.96	12.53	12.91	12.36	10.8	13	6.7	28	22.2	20.6
F158	17.67	19.87	20.46	3.55	4.06	4.48	2.74	2.84	3.02	7.97	11.84	12.31	11.4	6.9	6.7	24.9	18.8	17.6
F159	16.35	17.73	17.91	3.34	3.29	3.56	1.04	1.19	1.23	5.89	6.36	6.63	7.1	5.6	5.2	24.1	16.4	15.4
F160	12.37	14.82	14.2	2.73	3.65	3.36	1.74	2.04	2.09	5.53	7.28	6.43	12.2	7.6	5.9	20.1	16.9	12.9
F161	12.84	13.43	12.98	2.21	2.69	2.62	1.82	1.85	1.93	4.69	5.05	4.91	14.6	10.2	7.6	26.6	26.7	20.3
F162	15.11	15.87	16.46	3.13	3.65	3.98	2.32	2.55	2.82	7.21	9.5	10.26	14.9	5.5	4.7	25.3	18	19.1
F163	16.12	16.94	17.64	3.9	3.77	4.17	4.2	4.17	4.72	11.2	10.55	12.17	10.1	6.3	4.3	33.4	19.6	17.3
F164	17.79	18.31	18.97	3.96	4.03	4.17	2.51	2.65	2.57	9.63	10.39	9.64	6.5	5.7	4.9	17.3	17.3	14.9
F165	18.31	17.04	19.25	4.05	4.11	5.03	3.03	3.88	3.8	9.61	16.93	11.81	11.3	3.7	3.7	29.3	20.5	18
F166	16.71	22.18	21.36	4.32	4.53	4.15	3.23	3	2.6	10.09	11.84	10.26	9.8	6.8	5.3	28	24.9	23.3
F167	15.43	16.73	17.47	3.43	4.03	3.85	2.82	3.25	2.73	7.79	8.9	8.68	11.4	7.2	5.2	28.9	21.2	19.4
F168	19.87	33.73	20.43	5.09	5.59	5.32	3.25	3.81	3.55	11.89	13.38	12.51	6.8	4.2	4.2	17.3	17.1	11.6
F169	15.77	16.61	16.02	3.55	3.87	3.99	2.27	2.57	2.75	8.06	9.55	9.03	11.5	8.7	7.8	24.9	24.4	19.6
F170	15.09	15.63	19	3.63	4.14	4.47	1.41	1.58	1.81	4.89	6.3	6.97	6.7	5.3	2.5	14.4	13.4	11.5
F171	19.37	21.75	20.6	4.99	5.85	5.48	2.62	3.27	2.93	10.92	12.87	12.18	10.2	4.3	2.8	29	18.6	14.9
F172	22.59	24.52	24.47	4.53	5.13	5	2.45	2.42	2.49	10.35	11.21	11.16	7.6	5.6	5.5	36	25.7	21.5
F173	15.69	17.21	17.82	2.8	3.43	3.03	1.03	1.22	1.74	4.34	5.59	4.61	6.1	3.5	3.3	19.2	13.2	11.4
F174	16.53	17.8	16.41	4.13	4.15	4.22	2.79	3.19	3.23	9.95	10.31	10.3	11.2	6.1	4.4	29.6	19.8	19
F175	14.53	14.91	17.85	3.24	3.65	4.7	2.45	2.57	3.44	8.43	9.11	11.13	10.1	4.1	3.1	27.4	22	19.5
F176	13.02	15.79	14.75	3.11	4.11	3.81	4.28	5.05	4.73	9.33	11.35	10.08	12.2	9.8	8.5	30.9	22.1	17.6
F177	11.84	14.71	16.19	2.53	3.52	3.52	1.49	2.33	2.12	5.99	8.22	7.71	12.6	9.3	9.5	20.7	20.2	16.9
F178	17.23	20.51	19.28	3.58	4.57	4.38	2.49	2.86	2.5	7.84	9.93	9.23	9.9	8	5.3	26.4	24.7	22.1
F179	12.38	12.77	11.61	2.18	2.64	2.58	1.17	1.33	1.37	3.94	4.98	4.73	7	6.3	5.6	17.3	13.9	11.5
F180	20.73	22.13	23.95	3.63	4.45	4.65	2.05	2.61	2.9	8.13	10.78	11.25	12.9	4.7	5	27	21	21.4
F181	17.47	17.04	21.17	4.15	3.89	4.52	2.48	2.09	2.33	9.43	8.92	10.25	7.3	5	4.7	23.5	16.8	18.1
F182	22.57	26.33	25.89	3.8	4.96	4.76	1.99	3.27	3.31	9.39	13.73	12.75	14.7	4	3	31.8	24.1	24.5
F183	14.01	14.41	17.01	2.59	3.2	3.66	1.85	1.98	2.09	5.76	7.21	7.98	8.1	5.6	4.2	22.6	15.1	13.7
F184	18.35	21.01	23.01	3.62	3.79	4.03	1.56	1.63	1.7	7.51	8.17	8.57	11.4	6.2	4.3	28.5	19.9	20
F185	15.17	15.92	19.61	5.54	3.63	4.32	2.25	2.47	2.44	8	7.68	8.75	5.9	7.3	3.4	29.6	19.4	16.2
F186	12.77	13.79	17.05	3.15	3.84	3.87	1.4	1.95	2.11	4.92	7.17	7.22	15.4	10.3	6.4	22.5	18.3	15.9
F187	19.97	22.85	26.05	4.61	4.71	5.6	3.95	4.19	6.81	12.37	13.11	14.22	11.2	6.8	5	36.7	27.1	25.8
F188	14.01	14.42	15.02	2.89	3.93	4.1	2.13	3.87	3.03	5.93	9.92	10.09	14.5	10.2	8.9	19.4	19.8	15.3
F189	15.48	15.83	15.12	3.28	3.15	3.01	1.17	1.07	1.06	4.83	4.85	4.19	7.6	5.4	4.1	17	13.6	11.7
F190	11.77	11.37	10.48	2.66	2.56	2.33	1.05	0.99	1.23	3.88	3.97	3.74	10.7	9	6.5	16.8	15.3	13.9
F191	17.94	17.53	19.7	3.76	3.63	4.31	2.01	2.02	2.39	7.28	7.63	8.83	7.5	6.5	7.9	21.1	16.9	17.8
F192	16.92	17.53	18.25	3.79	4.03	4.3	2.33	2.51	2.49	7.34	7.52	8.13	11.4	8.6	6.7	32.9	25.1	17.7
F193	15.01	15.54	17.81	2.99	3.11	4.34	1.88	2.14	2.53	6.65	6.95	9.53	14.7	8.9	8.4	29.6	18.5	17.7
F194	12.24	21.37	16.13	2.85	3.13	4.16	2.77	3.25	4.64	6.43	7.82	10.64	12.1	7.6	5.8	16.8	15.2	16
F195	19.51	19.11	22.46	3.31	3.79	4.07	1.71	1.66	1.69	7.15	8.23	8.44	10.8	4.5	2.8	34.4	23.3	19.9
F196	14.7	16.04	20.97	3.17	3.46	4.87	2.09	2.15	3.04	6.33	7.17	10.33	11.9	7.2	6.1	16.3	14.2	15
F197	23.1	21.35	24.99	3.73	3.66	4.51	4.13	3.45	4.5	11.71	9.83	13.15	5.2	5.6	6.5	37.2	28.3	24.5
F198	15.36	15.24	17.89	3.53	3.13	3.99	3.88	3.44	4.41	10.24	8.97	11.59	9.4	8	5.1	24.1	21.2	22.1
F199	10.33	12.57	14.54	1.86	2.43	3.14	0.7	0.76	1	2.85	3.65	5.53	10.1	9	7.6	15.9	15.4	14.7
F200	18.25	14.35	16.47	3.64	3.32	3.59	2.51	2.55	2.48	8.94	8.45	8.86	12.1	8.8	6.2	34.4	21.1	26.3
F201	15.69	15.83	18.99	3.58	3.89	4.97	3.46	4.23	5.13	8.81	10.22	12.85	6.2	5.8	3.1	16.1	14.2	13.6
F202	19.64	19.79	24.77	3.96	3.79	5.59	1.35	1.81	2.32	5.75	6.11	10.19	19.5	11.3	8.1	25.5	20.3	20.3
F203	18.66	21.43	20.68	3.41	4.01	4.55	1.77	2.16	2.22	6.67	7.65	8.29	14	9.1	6.1	26.4	23.8	18.6
F204	9.97	9.07	10.67	2.13	1.98	2.44	1.24	1.19	1.3	3.63	3.48	3.93	8	7.1	5.5	17.6	14.2	8.2
F205	15.87	16	15.71	3.15	3.08	3.55	2.29	2.15	3.03	7.95	6.87	8.89	9.5	8.1	8	21.9	18.8	16.9
F206	18.69	19.27	19.97	4.28	4.15	4.05	2.9	2.74	2.75	8.71	8.37	8.3	15.3	11.7	8.7	30.5	19.4	21.3
F207	15.34	13.83	13.75	2.87	3.17	2.81	1.07	1.4	1.6	5.07	4.79	4.87	6.8	6.5	2.7	20.9	12.8	15.2
F208	19.36	21.31	21.29	3.73	4.03	4.57	2.55	3.31	3.55	8.45	9.35	10.67	17.1	18.5	13.8	25.8	25.3	23
F209	23.09	23.26	22.77	3.55	4.12	3.49	3.13	3.65	2.89	10.11	10.53	9.53	13.6	7.2	6.4	28.2	19.2	25.7
F210	18.73	18.99	17.79	3.55	3.85	3.04	3.31	3.03	2.75	9.26	9.17	7.85	23.2	18.7	14.8	28.8	26.8	26.2
F211	16.26	16.87	15.67	3.45	3.08	3.09	3.29	2.89	2.89	9.09	7.75	7.54	11	9.6	7.5	24.3	20.9	17.6
F212	14.46	15.83	15.07	2.72	2.71	2.54	0.87	0.99	1.07	5.21	4.55	4.34	12	6.3	4.7	23.8	18.7	16.5
F213	15.45	14.91	14.63	3.11	2.97	2.69	3.1	2.87	2.97	8.97	7.45	7.19	10.6	7.5	5.7	22.3	17.2	17.8
Nipponbare	20.16	21.17	22.81	2.88	3.58	3.74	1.42	1.58	1.7	5.03	6.7	7	9.7	5.7	5.3	24.9	20.7	17.3
9311	18.2	18.53	19.35	3.77	4.19	4.77	3.23	3.84	3.83	11.23	11.55	11.81	13.8	8.8	6.5	28.7	24.4	21.65

## Sheet: Ex2
Table S2. Phenotypic variation of the RIL population of 9311/Nipponbare cross among three seeding densities. SH, seedling height (cm); FLSL, first leaf sheath length (cm); FLL, first leaf length (cm); SLL, second leaf length (cm); SDW, shoot dry weight (mg); RDW, root dry weight (mg).
RIL	SH/LD	SH/MD	SH/HD	FLSL/LD	FLSL/MD	FLSL/HD	FLL/LD	FLL/MD	FLL/HD	SLL/LD	SLL/MD	SLL/HD	RDW/LD	RDW/MD	RDW/HD	SDW/LD	SDW/MD	SDW/HD
F001	18.22	20.82	21.35	4.15	4.82	4.8	3.89	3.87	3.83	11.32	12.79	13.23	9.225	6.8	5.45	20.4	18.5	15.45
F002	19.55	19.59	21.05	3.51	3.86	4.19	3.12	2.98	3.63	8.93	10.33	10.815	9.575	7.1	4.75	20.95	17.05	16
F003	17.82	18.14	19.85	2.97	3.25	3.28	2.56	3.01	3.22	8.92	9.57	9.79	9.975	7.25	6.825	22.35	19.65	17.65
F004	18.4	20.88	21.51	3.25	3.56	3.55	3.21	3.48	3.52	8.74	8.98	9.95	10.925	7.6	5.55	27.05	23.2	20.2
F005	18.74	19.82	21.32	3.31	3.49	3.79	3.55	3.71	3.77	8.66	10.31	10.69	11.4	9.05	6.725	27	25.85	21.85
F006	18.58	19.67	20.05	3.71	4.11	4.11	1.44	1.15	1.3	7.49	8.01	8.46	9.6	6.95	5.925	26.4	20	16.65
F007	16.11	16.13	16.68	3.83	3.74	4.04	3.98	3.82	3.88	9.11	8.87	9.89	10.475	6.8	5.4	19.75	17.85	12.45
F008	12.23	14.85	16.34	3.17	3.04	3.12	1.91	1.85	1.82	5.99	5.63	5.68	6.15	5.75	3.4	14	12	10.5
F009	15.77	20.17	21.07	3.09	4.25	4.36	1.39	2.77	2.61	7.44	9.49	9.43	15.325	11.05	9.075	20.65	19.95	14.45
F010	18.07	19.64	20.59	2.95	2.72	3.27	1.97	1.68	2.16	7.34	6.62	8.06	11.875	8.55	7.075	30.05	19.8	18
F011	15.07	16.01	19.53	3.38	3.83	4.42	2.03	2.42	2.56	6.66	7.62	8.93	8	7.75	5.95	17.15	15	13.75
F012	15.66	16.44	17.8	4.06	3.77	3.78	4.18	3.54	3.92	9.43	8.31	8.37	9.275	7.5	6.05	23.85	18.25	14.8
F013	17.18	18.77	19.01	3.66	4.04	4.13	4.47	4.86	5.17	8.7	10.39	10.11	8.7	7.2	5.2	19.3	18.4	15.4
F014	15.38	15.21	16.64	2.62	2.9	2.92	1.91	2.12	1.99	6.12	6.44	6.34	8.45	5.1	4.525	19.1	17.45	11.5
F015	16.47	17.75	18.21	3.52	4.01	4.14	4.25	4.67	5.17	7.78	9.31	9.52	8.925	9.45	6.15	19.3	13.45	12.55
F016	19.51	19.12	21.85	3.51	4.01	4.19	2.86	3.15	3.4	8.28	9.83	9.59	9.625	8.2	4.5	24.8	19.55	17.85
F017	16.65	17.96	19.99	3.89	4.05	4.62	3.33	3.19	3.18	8.33	9.44	10.82	10.075	6.95	6.05	20.9	18.65	17.6
F018	19.66	19.87	20.33	4.01	4.38	4.45	3.19	3.32	3.26	10.3	10.9	11.09	9.975	7.55	7.225	24.4	16.45	17.15
F019	13.13	14.63	16.65	2.71	3.05	3.46	3.17	3.16	3.51	6.51	7.52	8.66	7.65	4.45	4.125	13.85	11.55	11.25
F020	20.21	20.33	20.88	4.52	4.61	4.64	3.89	4.147	3.74	11.32	11.36	10.21	10.525	8.75	5.45	25.75	16.2	16.2
F021	13.89	15.45	17.61	3.11	3.58	4.47	2.51	2.61	3.74	6.77	7.72	9.91	7.9	3.9	3.35	15.4	14.4	11.8
F022	15.72	16.99	17.13	3.35	3.91	4.41	1.25	1.56	1.18	7.19	7.8	6.8	4.8	2.95	2.975	19.75	15.7	13.15
F023	15.35	16.94	17.92	3.56	3.99	4.02	2.31	2.63	2.67	8.31	9.34	9.8	5.95	5.6	4.85	19.05	16.05	13.85
F024	17.39	18.4	19.48	3.66	3.9	4.44	1.98	1.77	1.87	8.72	8.54	7.96	8.5	7.65	3.875	24.65	22.45	17.35
F025	14.47	17.49	17.29	3.02	3.78	3.84	1.77	2.24	2.02	6.64	9.07	8.69	7.25	5	3.5	16	12.5	9.5
F026	14.71	14.35	15.1	2.95	3.1	3.33	2.47	2.51	3.07	6.94	6.99	7.44	8.5	5.3	4.75	17.4	12.8	12.4
F027	17.12	19.76	19.83	3.63	3.94	4.65	1.87	2.77	2.6	8.83	10.33	10.8	8.7	6.55	5.125	19.65	15.65	14.15
F028	17.55	18.64	20.78	3.456	3.63	3.85	2.42	2.51	2.65	8.38	7.63	8.17	8.05	6.5	5.2	22.2	15.4	13.6
F029	16.36	18.16	19.5	4.28	4.63	4.88	3.36	3.17	3.35	9	10.49	11.41	10.05	7.35	5	18.2	16.1	13.45
F030	16.46	16.65	17.17	3.56	3.59	3.66	2.8	2.71	2.92	8.26	8.49	8.24	8.8	5.05	4.6	21.85	13.7	12.05
F031	14.62	16.29	16.95	2.76	3.73	3.88	2.25	2.51	2.6	6.46	8.21	8.07	11.5	9.8	5.725	16.75	15.25	13.15
F032	13.3	14.56	15.93	3.28	3.36	3.43	3.11	2.7	2.72	7.59	7.45	7.1	7.675	5.5	5.375	18.5	15.45	13.6
F033	12.38	13.58	14.21	2.61	3.14	3.6	2.88	3.13	2.67	6.11	7.08	6.92	10.05	6.6	7.15	16.55	14.15	12.7
F034	20.78	20.19	21.46	3.78	4.15	4.22	3.07	3.34	3.32	9.73	10.3	9.32	8.775	6.3	5.075	27.9	23.05	17.9
F035	13.75	15.04	15.7	2.93	3.54	3.66	3.6	4.02	3.63	7.17	9.25	8.91	10.25	6.8	5.05	16.3	13	10.8
F036	15.29	15.26	16.09	2.2	2.42	2.42	1.33	1.98	1.53	4.89	6.38	6.15	9.125	6.75	6.025	24.9	19.75	15.8
F037	17.27	17.57	18.55	3.44	3.01	3.75	1.77	1.33	1.77	6.84	6.06	7.93	17.425	11.35	11.35	23.9	18.15	18.85
F038	18.3	18.51	19	3.87	4.15	4.71	2.6	2.11	2.98	8.67	8.81	10.26	7.425	5.55	4.15	24.35	17.25	15.4
F039	13.21	14.17	15.4	2.76	3.39	3.7	1.68	2.19	1.83	5.87	7.52	6.75	9.3	6.45	5.575	16.25	14.1	12.85
F040	16.36	16.09	18.95	2.88	2.88	3.08	2.65	2.33	2.57	7.89	7.52	7.47	13.6	9.2	6.55	19.4	17.4	14.5
F041	13.08	14.05	14.75	2.3	3.24	3.38	2.9	3.37	3.37	6.12	7.67	7.63	7.45	5.5	5.575	16	13.75	13.85
F042	15.9	15.7	15.79	3.24	3.26	3.22	3.28	3.29	3.03	8.49	8.65	7.61	8.625	8.4	5.225	20.85	19.05	19.6
F043	14.87	14.87	15.62	3.12	2.89	3.26	1.71	1.22	1.75	5.77	5.11	5.79	10.775	7	4.5	19.6	15.5	15.3
F044	14.42	14.98	15.55	3.08	2.79	3.34	1.91	1.64	2.05	6.37	6.46	7.15	7.9	5	4.25	17	15	14
F045	13.98	14.04	16.03	2.59	2.86	3.41	2.51	2.58	3.02	5.45	6.53	8.06	10.175	7.35	5.525	14.6	10.2	10.7
F046	14.54	14.52	14.77	2.68	2.27	2.63	1.68	2.03	2.19	6.1	5.87	6.04	9.075	5.15	4.7	16.75	12.85	12.55
F047	15.76	16.56	15.61	3.45	3.35	3.59	2.86	2.78	2.91	8.58	8.77	8.25	9.125	7.85	7.2	17.35	16.05	14.65
F048	17.82	17.45	19.17	3.59	4.12	4.41	2.55	2.77	3.18	8.05	8	8.82	8.675	7	5.45	24	21.3	15.2
F049	16.86	17.32	16.87	3.75	4.2	4.3	2.44	2.74	2.65	8.11	9.07	8.27	12.725	8.8	8	24	22	16.1
F050	17.97	19.8	21.44	4.03	4.29	4.56	3.94	3.81	4.02	9.57	10.49	9.09	7.525	6.45	4.775	23.2	17.2	17.95
F051	15.36	16.17	17.11	3.36	3.38	4.17	2.22	2.14	2.56	7.07	7.33	8.67	10.5	9.3	6.5	19.25	18.25	15.25
F052	20.46	20.14	21.45	4.06	4.35	4.51	2.3	2.14	2.29	9.91	9.84	9.37	8.95	6.95	5.9	23.9	17.35	16.3
F053	14.44	15.61	18.01	2.45	2.55	3.3	1.81	1.72	2.39	6.65	7.33	8.35	12.5	9.75	8.05	18.6	16.95	17
F054	16.57	17.68	18.3	3.43	4.04	3.81	4.31	4.7	5.01	8.83	9.82	8.65	8.275	7.5	5.375	22.9	18.25	14.95
F055	16.6	16.27	17.33	4.03	4.8	4.81	4.51	4.75	4.73	8.72	9.89	9.31	10.95	9.15	5.175	17.2	17.5	15.75
F056	19.37	19.88	20.74	4.2	4.43	4.52	3.02	3.84	3.72	10.6	10.97	10.47	9.025	5.2	5.375	21.85	17.1	15.3
F057	14.75	17.16	17.44	2.86	3.43	3.5	1.32	1.64	1.5	6	7.32	7.36	8.475	6.25	6.575	17.75	17.15	15.5
F058	16.34	17.52	17.73	3.03	3.1	3.45	2.27	1.82	2.14	6.59	6.79	7.44	12.375	10.5	8.9	28.4	23.5	24.55
F059	13.63	15.6	16.53	2.84	3.32	3.44	2.87	3.91	3.35	6.84	8.67	8.68	6.875	4.65	2.975	16.95	15.2	12.7
F060	17.36	18.75	19.15	2.92	3.07	3.36	2.5	2.41	2.42	7.25	7.96	7.38	9.85	9	5	26.5	21.5	14.65
F061	13.03	14.01	15.05	2.97	3.32	3.95	1.87	1.92	1.88	5.04	5.97	6.91	6.575	5.3	3.85	15.2	13.55	11.95
F062	18.65	19.05	19.25	3.71	3.69	3.81	4.79	4.77	4.6	10.26	10.23	10.89	11.75	9	5.35	25	20.5	21.5
F063	17.65	18.2	18.56	4.11	4.12	4.44	3.25	3.16	2.66	10.03	10.15	9.34	7.525	4.85	5.25	22.65	16.5	14.2
F064	22.21	22.78	23	4.27	5.4	5.89	1.29	1.93	1.83	9.31	12.01	12.81	6.1	5.15	4.5	25.5	22.45	19.35
F065	19.1	20.68	21.58	4.09	4.35	4.58	4.57	4.82	4.4	10.92	12.19	12.9	11.175	8.8	5.6	22.4	19.45	14.45
F066	20.82	21.67	22.11	3.48	4.21	4.46	1.77	2.15	2.04	8.19	9.55	9.6	6.725	3.5	3.3	22.5	19.5	13.5
F067	17.31	18.84	20.01	3.95	4.34	4.33	3.79	3.12	3.63	10.03	10.31	11.68	12.1	9.4	5.925	21.05	18.55	17.15
F068	17.58	17.46	18.1	3.19	3.08	3.89	1.64	1.825	2.41	7.08	7.33	9.37	7.475	5.5	4.45	24.7	17.85	15.7
F069	11.28	11.94	13.9	2.52	2.78	3.24	1.88	2.36	2.38	4.83	5.89	6.93	10.45	8.25	5.15	13.1	13.35	11.65
F070	14.24	14.96	15.38	2.54	3.17	3.09	2.08	2.41	2.59	6.38	8.03	8.32	6.95	4.5	3.975	17.55	16.65	11.1
F071	18.38	19.1	19.26	4.24	4.01	4.55	4.1	3.87	3.96	9.29	9.8	10.92	7.725	5.55	5.15	25.9	25.15	20.3
F072	14.44	14.07	16.35	2.7	2.72	3.36	2.04	2.37	2.71	6.97	7.73	8.55	7.875	5.35	4.55	20.2	16.3	13.4
F073	12.63	15.76	16.8	2.35	3.3	3.53	1.75	2.72	2.21	6.16	8.29	7.1	12.575	9.85	7.35	25.2	23.7	21.6
F074	20.47	21.49	21.78	3.69	3.86	4.47	2.82	2.97	2.82	8.59	9.41	10.18	9.35	5.3	8.175	27.9	24.8	21.45
F075	12.98	14.5	14.59	2.26	2.64	2.66	1.72	1.95	1.67	5.33	6.7	5.37	16.275	13.5	9.475	23.15	21.2	20.25
F076	16.2	16.05	16.47	3.06	3.67	3.6	2.82	3.08	2.78	7.42	9.14	8.78	9.275	7.85	6.825	25.65	23.4	18.65
F077	14.11	15.63	15.66	3.13	3.4	3.56	3.37	3.63	3.86	7.53	8.33	9.02	8.175	5.5	5.275	15.15	13.25	12.95
F078	16.54	16.1	15.03	3.31	3.62	3.83	3.21	3.79	3.49	8.07	8.96	8.32	7.05	4.15	3.675	21.05	13.45	10.5
F079	15.37	16.19	17.29	2.72	3.35	3.79	3.28	3.74	4.36	7.32	8.06	9.81	8.2	4.2	3.75	18.95	16.6	14.3
F080	19.29	19.76	19.08	3.62	4.07	4.27	2.43	2.48	2.59	7.62	8.09	8.63	8.975	6.15	6.25	28.9	23.1	20.95
F081	15.7	17.89	17.72	2.88	2.87	4.09	1.75	1.68	2.2	6.88	6.69	9.41	8.1	6.9	6.25	22.65	18.75	15.85
F082	16.3	17.51	17.6	3.19	2.96	3.29	2.47	1.88	2.83	6.29	6.87	8.1	12.425	9.2	8.725	27.1	26.5	23.95
F083	15.91	18.11	18.53	3.67	4.1	4.1	3.68	4.14	3.84	8.68	10.33	10.18	7.1	4.55	4.175	21.45	18.95	19.25
F084	15.81	15.49	16.67	2.91	2.84	2.97	2.4	2.04	2.47	7.24	6.62	7.55	7.5	5.55	3.5	22.6	17.35	10.65
F085	15.91	16.67	17.06	3.21	3.5	3.95	2.86	3.12	3.46	7.43	8.95	8.74	7.9	3.85	3.325	13.35	12.65	12.35
F086	18.83	19.31	19.28	3.49	3.62	4.83	2.15	2.14	2.8	7.25	7.63	9.62	9.4	6.55	4.85	31.5	20.5	14.8
F087	14.87	17.71	17.92	2.87	3.46	3.86	2.39	2.66	2.74	6.41	7.84	8.59	7.825	5.1	2.9	21.55	19.4	17.8
F088	20.29	19.86	21.89	3.96	4.5	4.95	3.5	4.82	3.4	10.25	12.42	10.82	8.45	3.6	5.25	23.8	16.8	13.9
F089	21.11	22.06	21.56	4.71	4.77	5.01	3.37	3.43	3.32	10.25	10.46	11.25	12.725	11.1	10.025	35.45	35.3	26.9
F090	17.9	17.74	18.79	3.66	3.52	4.04	2.52	2.3	2.35	8.16	8.72	8.2	8.275	6.6	3.95	19.05	14.65	11.35
F091	17.08	18.67	17.84	2.77	2.8	3.72	1.45	1.65	2.29	5.91	6.07	8.04	10.45	8.3	7.625	24.8	24.75	20.2
F092	24.58	24.32	24.13	5.58	5.93	6.41	4.54	3.94	4.88	14.25	13.37	14.32	7.65	4.9	4.775	30.6	21.3	18.5
F093	12.87	14.93	16.48	2.7	3.19	3.44	3.48	4.08	4.02	6.45	8.27	9.28	9.4	5.6	4.6	16.75	16.55	15.5
F094	21.56	21.67	24.91	3.71	3.8	4.38	2.25	2.56	2.33	8.15	8.97	9.98	9.05	5.6	4.875	27.65	24.7	16.2
F095	13.78	15.11	15.26	2.64	3.17	3.22	2.89	3.56	2.92	7.24	8.2	8.38	9.9	6.25	4.825	20.25	19.95	14.45
F096	17.29	17.38	17.67	3.55	3.27	3.49	2.86	3.53	3.47	7.97	8.36	8.15	8.125	6.9	6.425	27.45	18.65	16.65
F097	15.46	16.98	16.93	3.02	3.54	3.74	2.11	3.34	2.78	7.36	9.38	8.84	12.275	11	8.1	27.9	27.1	22.65
F098	19.68	19.11	19.03	3.95	4.49	4.48	2.81	3.42	3.14	9.06	10.38	10.51	6.875	3.75	3.65	26	18.5	19
F099	13.72	16.29	17.79	2.9	3.37	3.73	2	2.4	3.08	7.14	8.69	10.3	8.1	4.45	7.225	19.9	18.9	15.5
F100	15.77	15.69	17.04	3.04	3.22	4.3	2.3	2.79	3.07	7.5	8.27	10.25	13.2	12.9	5.8	28.75	23.6	17.6
F101	12.96	15.11	15.55	2.87	3.43	3.34	2.41	2.86	2.6	5.56	7.75	8.03	9.2	6.3	5.825	16.2	14.7	11.1
F102	14.27	15.01	15.57	3.31	3.66	3.75	2.13	2.25	1.92	6.56	7.27	6.52	7.35	4.5	2.875	20.5	15.5	15.25
F103	11.43	14.08	15.05	2.54	2.74	3.04	2.57	2.53	2.7	5.86	6.35	6.66	8.8	5.15	5.4	18.05	18.05	15.9
F104	23.76	24.73	24.96	4.77	5.9	5.83	3.62	4.29	4.73	10.77	12.29	12.63	10.8	8.15	3.425	25.35	23.5	19.95
F105	14.19	16.69	16.87	3.25	3.63	3.8	3.2	3.05	3.14	6.86	7.78	7.67	11.5	8.6	7.7	22.3	24.2	19.2
F106	15.45	16.02	16.85	2.85	3.4	3.92	3.31	3.7	4.09	7.1	8.55	10.26	7.125	5.4	5.125	17.1	15.9	14.7
F107	15.8	17.16	17.02	3.65	3.7	3.77	3.6	4.09	3.64	8.4	9.28	8.83	8.95	5.85	5.7	23.7	17.2	16.9
F108	15.21	15.99	15.39	2.82	3.11	3.11	1.7	1.73	1.67	5.57	6.66	6.35	6.9	5.3	5.225	21.4	19.45	15.55
F109	14.5	14.64	15.53	2.99	3.09	3.34	2.52	2.82	3.04	6.8	8.04	7.88	9.875	6.75	4.975	26.1	19.9	18.15
F110	14.13	15.82	16.08	2.47	2.96	3.22	1.64	2.08	1.83	6.3	7.72	6.827	8.65	4.5	4.2	25.5	16	16.5
F111	17.14	17.06	17.24	3.26	3.07	3.34	1.96	2.38	2.62	8.07	7.33	8.24	9.875	6.6	4.7	22.45	19.9	13.45
F112	15.76	16.84	16.17	3.31	3.57	3.69	2.91	2.69	3.1	7.68	9.06	9.01	7.9	5.4	4.4	19.25	16.75	13.9
F113	17.81	18.5	21.92	3.63	4.18	4.63	2.93	3.52	3.82	8.98	9.45	10.85	7.85	5.7	4.675	25.2	18.8	17.5
F114	16.31	16.65	17.75	2.94	3.71	3.73	2.11	2.09	2.13	6.56	8.24	8.76	11.575	8.6	6.15	25.1	21.4	16.3
F115	15.19	16.82	17.69	3.29	3.82	4.04	3.24	3.78	3.92	7.74	9.38	10.3	6.65	3.6	3.925	22.75	19.65	18.1
F116	17.8	17.73	18.82	3.34	3.23	3.49	4.28	3.95	4.13	8.23	8.75	8.81	8.425	5.45	4.975	28.4	21.9	18.85
F117	14.73	15.49	15.18	2.68	2.58	2.85	1.03	1.29	0.72	4.23	4.02	3.07	8.9	7.8	5.075	28.5	22.95	19.85
F118	15.3	16.08	15.57	3.47	3.82	3.92	3.84	4.14	4.18	8.29	9.23	8.53	5.275	3	3.5	20.5	16.15	15.75
F119	13.75	14.77	15.51	3.01	3.21	3.48	2.94	3.13	3.35	7.07	7.37	7.9	5.725	5.15	4.45	17.65	17	15
F120	17.36	20.06	19.98	3.56	3.83	4.5	3.07	2.95	3.76	8.08	9.17	10.23	6.875	6.7	5.6	31.1	28.9	22.2
F121	19.98	19.45	20.39	3.37	3.83	4.05	3.48	3.97	3.72	9.76	10.16	10.84	8.4	5.9	3.025	22.3	19.75	14.15
F122	17.06	18.97	20.58	3.35	3.7	4.08	2.96	3.44	3.78	8.88	10.74	11.09	10.1	6.8	5.4	28	23.1	18.7
F123	16.03	17.44	19.81	3.2	3.43	4.1	3.25	3.43	3.71	8.57	9.11	10.44	10.25	7.2	3.8	23.55	18.55	15.55
F124	16.03	16.96	18.1	3.09	3.15	3.59	2.63	2.35	3.45	7.65	8.32	9.75	8.3	6.5	5.725	20.15	20.6	19
F125	16.47	18.03	19.57	3.26	3.5	4.21	2.56	2.22	2.72	7.55	7.61	9.36	9.775	6.1	2.625	22.85	17.9	16.25
F126	17.7	18.05	18.04	3.69	3.68	4.2	2.6	2.26	2.83	8.77	8.67	9.57	5.5	3.1	3.275	23.05	16.55	12.5
F127	14.94	15.94	17.02	2.59	3.32	3.47	1.6	1.77	1.84	6.14	6.99	7.65	7.75	4.45	3.925	19.5	16.5	14.25
F128	17.46	18.18	17.49	3.82	4.17	4.38	2.77	2.67	2.59	9.18	9.5	9.37	9.125	5.15	3.95	22.85	15.6	14.1
F129	14.06	14.65	15.07	2.61	2.91	3.06	3.12	2.9	3.05	7.11	7.84	7.54	7.2	5.75	4.3	27.15	22	16.7
F130	13.37	14.42	15.99	2.75	3.05	3.16	3.24	3.78	3.85	7.4	7.8	8.24	14.975	11.1	6.4	25	17.95	17
F131	18.09	18.73	19.21	3.01	3.31	3.5	1.71	1.8	1.5	6.82	7.22	6.54	6.65	4.6	3.925	22.15	19.4	15.65
F132	14.72	16.06	17.36	2.56	3.1	3.26	2.87	3.86	3.71	7.37	7.91	8.88	12.7	10.45	5.85	24.25	20.15	17.3
F133	16.49	15.97	15.72	2.78	2.69	3.06	2	1.84	1.71	6.25	5.39	6.34	8.9	7.35	3.375	27.55	24.05	15.35
F134	13.34	14.28	15.69	2.67	2.93	3.05	4.91	4.78	4.97	6.96	7.65	8.74	9.575	4.8	4.6	17.95	16.35	14.25
F135	16.22	17.43	16.22	3.02	2.91	3.22	2.82	2.83	3.01	8.17	7.7	8.65	10.075	9.4	3.8	19.6	17.7	13.05
F136	15.48	16.4	17.81	2.98	3.21	3.71	4.54	4.35	4.91	8.17	8.81	9.77	12.625	9.25	5.075	24	21.5	18.3
F137	16.23	17.42	18.32	3.01	3.7	3.82	4.01	4.63	4.37	7.75	9.7	9.87	12.55	5	5.2	24.5	18.5	14
F138	18.84	19.82	20.23	3.76	3.39	3.88	3.66	3.2	3.76	9.41	9.27	10.32	9.25	4.3	3.875	29	20.3	17.65
F139	14.59	14.14	13.33	2.65	2.48	2.63	3.52	3.59	3.04	6.55	6.31	6.22	9.65	6.05	6.525	20.55	20.4	13.05
F140	16.46	16.97	17.32	2.91	3.47	3.58	1.81	2.14	2.6	7.24	9.16	9.14	7.575	5.1	3.95	19.9	15.4	16.05
F141	19.46	18.64	17.02	3.91	4.41	4.43	2.16	2.41	2.14	8.49	9.46	8.86	9.3	8	5.2	23.65	24.95	16.85
F142	14.81	16.78	19.31	3.03	3.58	4.54	1.82	2.13	2.19	6.14	7.27	8.86	8.1	6.95	6.025	24.1	19.45	18.6
F143	16.77	15.22	14.58	2.82	3.02	3.24	1.16	1.29	1.1	6.11	6.21	6.06	5.125	5.95	4.475	18.2	15.6	11.6
F144	16.62	19.03	19.63	3.22	3.25	3.45	2.45	2.14	2.25	6.83	7.32	7.96	8.85	6.45	6.025	25.8	22.35	21.3
F145	18.34	19.23	19.61	3.43	3.44	3.48	2.16	2.05	2.37	8.35	7.69	8.5	10.575	8.3	5.925	23.05	20.25	18.4
F146	16.94	17.88	18.52	3.08	3.14	3.33	1.76	1.7	1.57	6.86	7.14	7.05	10.5	7.25	4.525	19.3	17.85	16.5
F147	22.05	22.01	20.31	3.74	4.34	4.38	2.53	3.27	3.19	8.47	10.21	10.24	7.9	5	4.175	32.9	25.35	23.85
F148	14.49	15.49	16.68	2.67	2.59	2.46	1.86	2.02	1.89	6.17	6.46	6.32	8.75	7.2	5.65	23.7	22.4	20.2
F149	17.86	19.14	19.38	3.58	3.53	4.53	2.43	2.58	2.92	7.22	7.38	9.28	5.8	4.8	3.675	21.95	19.2	15.85
F150	13.05	14.36	14.45	2.98	2.82	2.81	2.76	2.94	2.89	6.76	7.47	7.37	11.575	8.2	6.625	20.5	17.1	13.35
F151	18.33	19.86	19.57	3.48	3.44	4.04	2.48	2.11	2.49	9.06	8.31	9.92	8.55	6.5	4.95	26.4	22.75	18.75
F152	16.02	16.56	19.22	3.81	3.78	4.51	2.54	2.5	3.22	7.92	8.38	10.63	8.95	5.6	4.75	23.5	20.15	17.15
F153	17.91	19.33	19.6	2.76	3.01	3.66	0.93	0.84	1.17	4.7	4.91	6.29	13.125	11.5	9.125	33.45	28.7	22.15
F154	12.8	14.33	14.58	2.79	3.04	3.26	2.63	2.78	2.47	6.16	7.23	6.51	8.475	3.9	4.275	15.4	11.65	11.55
F155	14.72	15.36	15.01	2.49	2.72	2.7	2.18	2.22	2.28	5.83	6.68	6.78	9.15	6.55	4.775	23.45	18.5	15.35
F156	17.39	17.46	19.37	3.01	3.73	4.27	1.91	2.16	2.47	6.89	8.46	9.76	10.35	6.7	5.7	15.85	18.05	14.5
F157	21.58	21.55	22.16	4.14	4.64	4.8	3.88	4.34	3.4	11.4	12.01	10.75	9.15	5.6	4.5	26.2	21.6	18.65
F158	17.45	20.89	21.84	3.07	3.82	4.19	2.39	2.81	2.44	7.48	9.41	9.98	10.675	5.25	5.6	26.65	23.1	23.7
F159	14.1	17.11	19.36	3.27	3.22	3.32	1.61	1.29	1	6.25	6.16	10.41	7.775	7.6	6.275	25.4	18.9	16
F160	14.1	15.33	17.02	2.45	2.66	2.64	1.58	1.4	1.47	4.82	5.4	8.44	9.075	6.3	5.05	15	15.75	12.95
F161	14.56	15.07	14.19	2.63	2.64	2.67	1.97	2.24	2.12	5.24	5.56	13.29	12.925	9.45	7.825	26.05	22.9	19
F162	13.35	14.73	16.62	2.27	2.28	2.85	1.84	1.6	1.47	5.39	5.61	7.37	11.075	8.55	5.175	20.4	16.8	18.3
F163	15.55	16.24	16.78	2.51	2.6	2.93	2.66	3.93	3.84	7.09	8.27	16.96	12.6	11.4	6.35	26.15	25.55	19.2
F164	16.95	17.82	19.69	3.44	3.77	4.61	2.16	2.63	2.78	7.84	9.93	11.44	8	6.1	5.5	18.75	16.35	15.25
F165	18.64	20.05	20.35	3.35	3.26	3.26	3.62	3.18	3.32	8.73	8.89	10.5	10.525	9.4	4.225	28.5	22.25	17.35
F166	17.71	21.08	20.75	3.15	4.06	4.21	2.43	3.43	3.53	7.68	11.13	11.43	9.875	7.55	4.525	26.9	24.15	19.05
F167	18.43	19.73	20.47	3.43	4.02	3.85	2.82	3.24	2.73	7.79	8.9	11.68	11.4	7.2	5.2	32.9	25.16	18.26
F168	15.4	16.6	18.55	3.5	3.76	4.19	2.89	2.47	2.83	7.88	8.73	10.16	8.375	7.35	4.75	19.95	15.75	14.2
F169	18.37	16.88	18.09	3.17	3.01	3.34	2.5	2.13	3	8.76	8.5	10.32	10.1	8.4	6.45	24.45	20.75	14.9
F170	17.3	18.52	18.62	2.82	3.21	3.35	1.09	1.18	1.09	4.63	4.98	4.76	5.775	4.35	2.95	17.4	15.9	14.85
F171	18.36	20.75	23.6	4.98	5.85	5.88	2.62	3.26	2.93	10.92	12.87	12.18	10.215	8.3	6.345	33	22.63	18.93
F172	19.16	21.25	23.13	3.95	4.59	5.5	2.22	2.28	2.86	8.6	10.43	11.91	6.525	5.05	5.275	22.25	20.9	17.3
F173	19.63	20.73	19.05	2.89	2.99	2.94	0.69	0.63	0.91	4.65	4.98	5.44	6.4	6.15	4	22.45	19.75	18
F174	14.19	15.34	16.39	2.96	2.89	3.42	2.48	2.52	2.96	7.11	7.67	8.66	11	8.75	5.1	20.05	20.75	15.5
F175	17.14	16.34	15.84	2.61	3.18	3.29	1.97	2.57	2.17	6.79	7.88	7.85	9.8	7.5	5.175	23.8	19.5	17.8
F176	15.69	16.76	16.93	3.28	3.35	3.34	2.88	3.99	2.77	8.29	9.51	9.03	9.05	7.5	6.15	19.3	16.1	16.25
F177	17.37	18.01	16.61	3.13	3.28	3.65	2.11	1.97	2.18	7.15	8.24	8.42	6.3	6.05	5.925	23.05	20.5	18.95
F178	18.04	18.38	17.6	3.62	3.92	4.36	2.91	2.82	2.5	8.72	8.94	9.4	7.275	5.7	4.2	23.4	18.9	16.75
F179	16.51	17.78	15.65	3.1	3.04	3.2	1.23	1.32	1.42	5.79	5.75	6.1	6.375	4.4	4.1	18.85	17.25	14.3
F180	18.12	19.3	19.55	3.17	3.49	3.39	3.04	2.94	3.08	7.94	8.42	8.62	9.9	6.45	4.925	26.15	24.45	23.9
F181	17.28	19.33	18.95	3.48	4.17	4.78	2.23	2.57	2.89	7.32	9.29	10.14	6.55	5.95	4.2	21.75	19.95	14.45
F182	16.55	18.25	17.63	3.59	3.76	4.07	2.42	2.65	3.12	8.81	9.53	9.73	9.7	7.95	3.575	16.7	15.35	13.55
F183	16.2	17.71	18.04	3.36	3.65	3.6	2.24	2.6	2.73	7.27	8.61	8.11	7.125	4.6	3.925	17.95	16.45	15
F184	16.04	17.8	17.48	3.33	3.28	3.47	1.52	1.58	1.52	7.52	7.68	7.79	11.7	11.55	7.45	25.45	26.4	21.6
F185	19.01	19.67	21.11	3.31	3.41	4.2	1.9	1.86	2.21	7.36	7.97	8.68	5.625	5.4	4.525	21	17.5	16.2
F186	14.38	14.77	15.06	2.75	3.17	3.38	1.62	1.61	1.81	4.8	6.44	7.02	11.15	8.95	5.7	22.15	22.85	17.2
F187	19.96	20.84	23.05	4.6	4.71	5.6	3.95	4.19	4.8	12.36	10.11	12.22	11.2	8.8	5	30.7	28.33	22.4
F188	15.97	15.41	16.64	2.86	3.14	3.64	2.98	2.96	3.52	8.09	8.53	9.75	9.725	7.4	6.975	19.5	16.45	13.85
F189	17.84	17.07	17.09	2.97	2.97	2.97	1.34	1.08	1.07	7.34	4.38	4.42	6.45	4.9	4.175	24.5	19.7	16.45
F190	17.39	16.92	14.49	3.13	2.67	2.88	1.22	0.99	1.16	5.5	4.76	6.34	7.95	5.1	5.25	16.2	13.9	11.65
F191	19.1	20.47	19.22	3.33	3.75	4.1	2.38	2.17	2.06	7.15	8.37	8.82	8.125	6.1	6.8	23.9	18.15	16.4
F192	19.92	20.52	21.25	3.79	4.03	4.3	2.33	2.51	2.48	7.34	7.52	8.13	16.165	12.63	6.7	29.6	23.2	16.7
F193	17.61	17.82	17.87	3.49	3.72	4.19	2.35	2.49	2.5	8.09	8.02	9.1	10.2	8.4	6.175	23.6	17.4	15.35
F194	15.47	17.8	18.02	3.12	3.99	3.8	3.88	4.32	4.11	7.84	10.12	10.15	8.975	4.7	4.8	20.7	15.55	13.3
F195	19.5	22.1	22.46	3.3	3.78	4.06	1.71	1.66	1.69	7.14	8.22	8.44	7.82	4.53	2.815	38.4	23.33	16.83
F196	20.77	21.76	22.4	3.26	4.25	4.46	2.03	2.35	2.3	7.4	10.46	9.43	8.1	6.8	4.2	22.05	17.25	12.9
F197	16.95	19.36	19.46	3.42	3.85	4.18	3.93	4.41	4.74	9.79	11.23	11.92	5.075	4.6	4.55	23.6	19.1	15.9
F198	14.82	16.99	17.07	3	3.14	3.11	3.6	4.12	4.53	8.63	9.71	10.32	6.55	5.15	3.725	20.1	16.3	12.1
F199	18.23	19.39	20.14	2.59	2.76	2.93	1.01	1.12	0.92	4.72	4.74	5.15	7.25	5.85	5.1	23.15	20.8	15.7
F200	14.1	15.35	16.57	2.85	3.18	3.57	2.95	3.36	4.05	7.6	8.97	9.93	8.75	7.5	5.3	26.6	18.45	17.3
F201	15.01	17.99	19.6	2.49	2.87	2.82	3.34	3.61	3.76	6.95	8.4	8.49	5.625	3.2	2.95	20.7	17.6	13.8
F202	22.47	23.67	22.73	4.28	4.63	5.59	2.27	2.07	2.46	6.89	7.83	9.19	16.725	12.95	8.875	23.75	20.45	16.3
F203	16.31	18.73	18.65	2.74	3.36	3.42	2.12	2.13	2.11	5.07	5.97	6.3	9.35	7.55	4.325	18.5	14.95	14.4
F204	14.4	15.02	14.95	2.27	2.33	2.61	1.31	1.24	1.29	4.89	4.73	4.85	6	2.9	2.825	17.85	14.45	11.15
F205	15.73	16.56	17.42	3.46	3.59	3.82	3.45	3.62	3.61	8.72	9.7	10.45	7.075	5.35	5.675	19.5	15.55	12.7
F206	20.62	20.69	21.65	4.15	4.57	4.65	3.69	3.55	3.38	9.75	8.93	11.16	11.525	8.3	6.625	28.65	20.9	15.7
F207	14.3	15.57	16.84	2.86	3.31	3.14	1.84	2.12	1.86	4.45	5.18	5.57	5.65	4.65	3.575	19.4	19.25	16.7
F208	18.55	19.16	19.6	3.29	3.45	3.81	2.84	2.94	2.91	7.34	8.14	9.15	11.525	4.2	3.65	22.1	18.2	12.85
F209	15.82	18.4	18.8	3.44	3.54	3.82	3.62	3.48	2.94	8.5	10.14	9.94	9.075	6.55	4.85	15.5	16	12.5
F210	16.9	17.66	18.77	2.97	3.44	3.78	2.84	3.92	3.84	7.58	9.43	10.48	18.375	13.45	8.825	20.6	14.45	14.1
F211	18.82	18.45	18.77	3.96	3.74	4.2	4.32	3.79	3.74	9.55	9.07	9.64	8.6	5.7	5.3	23.3	21.2	15.85
F212	15.72	17.99	16.45	3.2	3.36	3.79	1.42	1.59	1.55	5.54	6.59	6.79	9.625	4.4	4.425	17.05	14.8	13
F213	16.15	16.55	16.21	2.62	2.97	3.48	4.31	3.69	3.99	8.56	8.1	8.12	7.95	4.55	3.3	16.8	15.8	13.75
Nipponbare	18.23	19.07	19.68	2.72	3.13	3.14	1.56	1.57	1.67	6.14	6.45	7.18	8.7	6.1	5.95	19.5	16.3	14.8
9311	16.63	17.01	17.7	3.3	3.6	3.83	3.15	3.33	3.44	6.64	7.84	8.39	12.3	8.1	7.03	22.7	20.3	18.9

## Sheet: Ex3
Table S2. Phenotypic variation of the RIL population of 9311/Nipponbare cross among three seeding densities. SH, seedling height (cm); FLSL, first leaf sheath length (cm); FLL, first leaf length (cm); SLL, second leaf length (cm); SDW, shoot dry weight (mg); RDW, root dry weight (mg).
RIL	SH/LD	SH/MD	SH/HD	FLSL/LD	FLSL/MD	FLSL/HD	FLL/LD	FLL/MD	FLL/HD	SLL/LD	SLL/MD	SLL/HD	RDW/LD	RDW/MD	RDW/HD	SDW/LD	SDW/MD	SDW/HD
F001	20.19	22.5	22.61	4.52	4.69	4.81	3.95	3.73	3.87	14.1	15.43	15.41	6.51	5.4	4.08	17.85	17.13	16.91
F002	22.35	22.81	24.01	3.95	4.39	4.67	3.58	3.59	3.73	11.73	13.08	14.16	7.14	4.43	4.03	24.91	20.06	17.03
F003	21.2	20.87	22.24	3.4	3.38	3.71	2.87	3.47	3.59	11.78	11.21	12.08	6.59	4.81	4.56	22.74	20.21	18.16
F004	20.22	19.5	21.04	3.47	3.67	3.65	3.48	3.52	3.63	10.79	10.37	10.79	8.31	5.83	5.18	26.26	20.53	20.53
F005	20.34	20.77	20.83	3.38	3.45	3.75	3.56	3.43	3.73	10.56	10.75	11.48	8.05	6.26	5.21	25.3	22.56	19.69
F006	20.41	20.7	20.68	4.01	4.07	4.47	1.58	1.38	1.6	9.37	9.35	10.05	6.85	5.04	4.76	26.98	20.25	16.94
F007	18.52	19.19	19.68	3.92	4.18	4.4	3.51	3.74	3.97	11.31	11.97	12.7	7.44	5.58	4.7	23.64	20.89	18.19
F008	14.15	14.28	15.52	3.39	3.43	3.4	1.98	1.83	1.81	7.3	8.01	7.29	4.58	3.66	3.85	16.98	13.28	10.45
F009	19.54	21.78	22.12	3.92	4.25	4.26	2.32	2.93	2.93	10.28	11.68	11.48	7.91	6.89	6.69	21.89	18.96	18.44
F010	18.94	18.21	19	3.57	3.47	4	2.66	2.61	2.63	9.52	9.43	10.22	8.04	5.36	5.84	30.14	20.68	18.35
F011	17.56	17.56	19.01	3.62	3.69	4.17	1.93	2.5	2.34	8.29	8.81	9.17	5.65	5.34	5.88	21.16	17.3	17.01
F012	18.52	18.91	18.56	4.11	4.4	4.52	3.79	3.61	3.83	10.69	11.51	11.52	6.69	5.73	4.73	22.96	18.94	15.63
F013	18.41	20.3	20.15	3.89	4.04	4.4	3.94	4.18	4.5	11.05	11.83	11.62	6.5	5.38	4	17.75	17.05	13.6
F014	16.35	17.6	18.25	2.99	3.34	3.89	1.84	2.18	3.06	7.66	8.53	9.52	5.78	3.58	3.46	20.05	16.66	12.65
F015	18.44	18.98	20.54	4.27	4.24	4.7	4.43	4.51	5.25	12.14	12.54	13.65	6.11	5.51	4.53	17.25	14.76	14.56
F016	21.46	21.35	22.93	4.12	4.38	4.88	3.22	3.64	3.49	11.32	12.45	13.48	7.26	5.5	4.5	25	19.59	18.29
F017	19.59	20.81	22.01	4.12	4.26	4.53	3.74	3.51	4.01	11.81	12.24	13.53	7.59	6.24	5.58	22.33	20.41	18.35
F018	20	20.92	21.08	3.94	4	4.11	3.2	3.18	3.15	11.96	12.19	12.29	9.98	7.98	7.23	28.75	19.98	18.93
F019	15.28	15.46	17.41	3.12	3.03	3.6	2.79	2.73	3.21	8.83	8.97	10.59	6.48	4.81	4.11	19.91	14.89	13.54
F020	23.1	23.79	24.47	4.77	5.19	5.32	4.07	4.38	4.32	13.95	15.41	15.35	7.01	6.79	4.13	25.99	19.85	17.65
F021	16.21	16.75	18.28	3.53	3.86	4.19	2.8	3.05	3.61	9.12	9.71	10.75	5.35	3.65	2.53	18.9	16.63	14.58
F022	19.1	19.06	19.3	3.81	3.67	3.72	1.5	1.56	1.43	8.12	8.48	8.15	3.65	3.16	2.89	21.19	16.45	14.61
F023	16.7	18.45	18.27	3.63	3.89	3.85	2.58	2.65	2.77	9.75	10.95	10.39	5.28	4.5	5.28	21.86	19.26	17.24
F024	17.28	17.1	18.78	3.49	3.79	3.23	1.85	2.02	1.8	8.84	9.53	8.13	8.5	6.13	3.88	31.68	23.33	18.03
F025	14.5	16.61	15.63	3.29	3.29	3.2	1.54	1.86	1.7	7.54	8.15	8.24	5.88	4.58	4.25	17.3	15.25	12.7
F026	15.34	15.87	16.61	3.76	3.85	4.28	3.25	3.43	3.5	9.51	9.7	10.24	5.7	3.68	3.78	20.45	15.5	14.03
F027	18.71	18.66	20.36	4.03	4.29	4.5	2.89	3.28	2.79	11.75	12.67	12.82	6.3	7.14	4.36	19.96	20.61	17.71
F028	18.84	18.86	19.93	3.27	3.64	3.63	3.03	2.73	2.68	9.36	9.73	10.39	8.05	4.95	4.2	30.95	22.65	20.7
F029	17.2	18.77	19.21	3.81	4.19	4.53	3.35	3.3	4.34	10.59	11.79	12.26	7.13	5.14	4.35	19.53	18.35	16.49
F030	18.54	19.56	19.27	3.65	4.04	4.05	2.7	2.87	2.93	9.81	10.93	10.94	6.55	4.14	3.95	23.76	18.15	17.26
F031	17.93	19.59	19.06	3.49	3.83	3.82	2.95	2.84	2.82	9.41	9.94	10.58	7.85	5.98	4.31	24.71	18.11	14.56
F032	17.93	18.07	20.14	3.62	3.67	4.36	2.89	2.9	3.29	10.03	10.78	12.03	6.44	4.73	3.94	21.18	16.56	15.15
F033	15.63	17.66	17.47	2.59	2.88	2.96	3.09	2.99	2.9	7.38	8.38	9.21	7.38	6.85	6.58	23.19	23.01	19.98
F034	19.98	20.75	21.03	4.18	4.57	4.61	3.64	4	3.86	10.94	11.69	12.1	5.74	4.18	4.24	24.1	18.61	17.83
F035	16.7	18.47	18.68	3.17	3.35	3.74	3.48	3.53	3.74	9.67	10.49	11.05	6.68	6.33	4.08	19.33	16.83	13.08
F036	16.07	16.77	16.85	2	2.15	2.13	1.62	1.95	1.61	4.89	5.48	5.08	6.56	5.14	4.96	28	22.39	19.18
F037	21.8	22.54	23.57	3.79	3.44	3.93	2.05	1.93	2.06	7.57	7.58	8.92	10.81	8.86	7.28	30.3	24.59	22.01
F038	20.18	20.63	21.34	3.91	4.25	4.68	2.73	2.54	2.77	9.71	10.05	10.94	5.61	4.49	4.18	24.99	18.54	18.18
F039	16.74	16.45	17.92	2.98	3.05	3.64	1.91	1.81	2.81	7.6	7.56	9	9.3	6.03	5.58	24.23	18.15	16.28
F040	17.15	17.4	18.74	2.93	3.07	2.94	2.58	2.85	2.61	9	8.56	8.66	9.85	6.48	5.68	23.85	19.58	17.88
F041	16.41	19.19	19.25	2.6	3.78	3.01	2.75	3.58	3.12	9.12	10.52	10.24	5.98	4.45	4.44	22.85	16.04	16.61
F042	16.35	17.33	17.6	3.02	3.23	3.33	2.85	3.42	3.14	9.34	10.31	9.62	6.76	5.33	4.56	24.11	21.46	19.05
F043	20.55	21.72	22.28	3.12	3.05	3.46	1.61	1.5	1.68	6.46	6.59	6.99	9.14	6.23	5	24.2	21.28	18.6
F044	15.57	15.68	16.53	3.16	3.26	3.65	2.02	2.11	2.15	7.62	7.64	8.76	6.4	4.15	4.43	18.65	14.2	12.9
F045	16.03	16.7	18.18	3.2	3.25	3.92	2.65	2.71	3.33	8.67	9.13	10.85	7.14	5.24	4.36	19.33	15.93	14
F046	16.18	16.65	16.82	2.46	2.41	2.87	1.51	1.91	2.11	7.17	7.14	7.64	6.09	4.79	3.75	21.89	17.96	17.46
F047	16.41	17.59	17.03	3.11	3.58	3.45	3.06	3.36	3.05	9.86	10.91	10.19	6.81	7.01	5.6	19.76	17.66	17.19
F048	18.54	19.28	19.55	3.84	4.19	4.23	2.43	2.73	2.68	10.94	10.58	10.38	6.09	5.03	4.88	22.53	19.23	15.1
F049	17.88	19	19.12	4	4.16	4.24	2.33	2.73	2.56	10.52	10.11	9.83	8.86	7.75	6.3	23.78	20.48	17.23
F050	18.72	20.37	20.43	3.73	4.09	4.92	3.66	3.66	4.46	9.98	10.91	13.34	5.16	4.34	3.64	22.45	16.73	16.04
F051	19.86	19.79	19.28	3.48	3.78	4.16	2.19	2.32	2.27	8.17	8.94	9.45	7.6	6.9	4.8	21.44	19.64	16.66
F052	22.45	22.77	23.22	4.22	4.7	4.67	2.35	2.49	2.38	10.42	11.73	11.33	7.38	5.69	5.15	30.03	19.44	17.93
F053	14.44	14.36	16.27	2.7	2.7	3.19	1.62	1.73	1.98	7.43	7.67	8.82	7.7	5.99	5.63	19.15	16.29	15.4
F054	17.6	17.55	17.71	3.61	4.05	4.44	3.85	4.43	4.35	10.77	11.7	11.92	6.44	4.95	4.19	22.8	19.36	16.21
F055	17.74	18.88	19.47	4.08	4.25	4.42	3.73	3.87	3.7	10.59	11.17	10.81	7.28	7.09	4.49	21.25	21.4	16.14
F056	20.84	21.6	24.66	4.78	5.02	5.26	3.82	4.27	4.42	12.31	13.98	13.65	6.61	5.18	4.59	22.59	18.08	16.93
F057	14.96	16.21	16.24	2.54	2.38	2.44	2.02	1.38	1.24	5.94	5.27	4.81	7.59	4.96	4.09	21.29	20.06	19.1
F058	19.29	19.23	19.23	3.22	3.28	3.61	2.18	2.29	2.43	7.68	7.99	8.69	8.84	6.53	6.65	31.4	23.78	21.09
F059	15.26	16.07	16.69	2.91	3.26	3.34	3.1	3.39	3.32	9.06	10.14	10.76	4.59	3.71	2.39	18.56	14.93	13.7
F060	17.27	18.36	18.76	3.5	3.57	4.15	2.67	2.99	3.23	10.18	10.85	10.69	8.03	6.65	5.15	21.13	17.83	16.36
F061	14.3	16.59	16.5	3.17	4	3.72	1.63	2.12	1.87	6.49	8.1	7.54	5.39	5.18	4.08	18.25	15.51	15.26
F062	19.33	19.27	20.48	3.88	3.66	4.28	4.44	4.16	4.32	12.37	12.4	13.4	8.48	4.58	4.33	27.2	21.13	18.55
F063	16.78	17.87	19.37	3.35	3.58	3.85	2.61	2.77	2.7	10	10.18	10.88	6.16	5.36	4.58	21.46	17.83	17.23
F064	21.85	23.62	23.91	4.31	4.74	5.2	1.89	1.75	2.6	10.85	11.64	12.45	5.15	5.16	4.9	26.83	22.26	20.54
F065	16.47	18.22	19.09	3.39	3.68	4.15	4.37	3.32	3.71	10.85	11.83	12.49	7.44	5.85	4.4	21.13	17.94	15.94
F066	19.69	19.74	19.26	3.54	3.83	3.83	2.13	2.3	2.22	9.43	10.03	10.2	5.36	3.35	3.35	23.9	18.98	16.63
F067	19.35	20.5	20.43	3.63	4	4.11	3.48	2.81	2.96	11.37	11.57	11.86	8.25	5.93	4.56	24.06	19.79	17.54
F068	17.49	19.69	19.46	3.01	2.9	3.15	1.66	1.82	2.03	8.1	7.77	8.64	5.99	5.05	4.58	24.75	20.94	19.98
F069	17.5	16.06	16.56	3.11	3.05	3.25	1.93	2.1	2.38	6.55	5.94	6.18	7.93	5.86	5.88	21.63	20.41	18.46
F070	15.44	15.52	15.62	3.01	3.07	3.33	2.24	2.47	2.65	8.64	9.25	9.82	5.43	4.38	3.34	21.26	17.09	14.68
F071	19.73	19.19	20.43	4.29	4.14	4.48	3.6	3.47	3.66	10.58	11.52	12.04	6.56	6.64	5.23	26.28	26.01	21.05
F072	14.91	15.26	15.71	2.85	2.87	3.28	1.79	2.39	2.46	8.5	8.99	9.47	5.84	4.69	3.68	22.15	18.23	15.9
F073	12.52	13.84	13.96	2.24	2.6	2.56	1.52	2.14	1.89	6.19	7.53	7.34	7.69	5.84	5.18	19.28	18.18	16.33
F074	19.03	20.7	21.13	3.4	3.54	4.03	2.77	2.76	2.74	8.67	9.17	10.49	6.48	5.33	4.29	24.8	21.4	23.09
F075	15.84	16.89	16.44	2.68	2.94	3.02	1.73	1.97	2.13	6.57	8.24	7.47	9.79	6.23	6.54	22.19	19.38	17.29
F076	18.59	19.83	20.14	3.13	3.39	3.54	2.56	3.05	2.65	8.65	9.59	9.6	6.39	6.41	5.26	26.36	25.1	21.66
F077	14.6	15.63	16.35	3.15	3.26	3.68	3.03	3.46	3.52	9.05	9.43	10.67	5.69	4.83	3.94	15.76	14.64	13.99
F078	14.73	16.16	15.95	3.01	4.32	3.47	2.84	3.23	3.1	9.01	13.68	10.32	5.13	3.99	3.29	17.01	15.29	12.65
F079	15.99	16.96	17.45	3.04	3.21	3.61	3.35	3.55	4.38	9.97	10.82	11.15	5.9	4.3	4.33	21.21	17.83	17.78
F080	18.19	18.31	18.13	3.34	3.83	3.99	2.07	2.55	2.57	7.59	9.05	9.37	6.99	5.21	4.93	25.3	21.2	19.04
F081	16.6	16.28	16.64	3.19	3.03	3.4	2.04	2.07	2.14	7.94	7.92	8.87	6.2	5.38	5.08	21.56	18.41	17.66
F082	15.97	16.32	16.92	2.97	2.93	3.47	2.18	2.2	2.8	7.53	7.66	9.34	8.41	7.1	5.86	25.38	22.98	20.64
F083	17.97	19.27	19.6	4	4.16	4.4	3.51	4.14	4.17	11.43	12.47	12.35	6.35	5.26	3.89	22.14	19.54	18.66
F084	14.1	14.05	14.19	2.94	2.93	2.91	2.19	2.13	2.3	7.9	7.56	8.11	4.9	3.84	3.1	15.08	14.44	11.26
F085	15.7	16.88	17.79	3.81	3.59	3.74	2.93	2.97	3.02	9.42	10.74	11.59	5.9	4.61	3.51	17.44	15.24	14.39
F086	17.46	18.89	18.57	3.41	3.73	4.23	2.26	2.67	2.53	7.3	8.44	9.09	6.55	6.29	4.08	24.4	20.2	16.1
F087	15.25	17.01	18.37	3.28	3.54	3.75	2.07	2.25	2.45	8.42	9.29	10.33	5.51	3.85	3	18.74	17.9	15.85
F088	19.31	20.19	20.7	3.9	3.95	4.31	3.43	3.61	3.38	11.97	12.27	13.71	5.98	5.3	4.73	22.63	18.88	17.98
F089	23.61	24.47	24.71	4.75	4.87	5.12	3.18	3.16	3.22	11.06	12.5	12.9	8.21	8.33	7.46	27.51	26.65	25.63
F090	16.9	19.71	19.3	3.81	3.95	4.43	2.93	2.78	3.09	10.42	10.57	11.86	5.84	4.5	4.73	19.31	15.99	17.04
F091	16.45	17.47	17.04	3.16	2.93	3.55	1.69	1.7	2.09	6.81	6.62	7.73	7.68	6.93	6.56	20.35	19.51	17.85
F092	22.42	23.58	22.39	4.88	5.36	5.41	3.72	4.28	4.15	13.39	14.02	14.23	5.73	3.68	3.79	23.45	19.58	17.9
F093	16.95	18.42	19.88	3.75	3.96	4.49	3.47	3.87	4.19	10.17	11.52	12.42	6.9	7.78	5.1	24.44	22.29	22.35
F094	19.73	21.2	20.95	3.94	4.13	4.69	2.4	2.38	2.52	9.25	10.31	11.03	6.48	5.45	3.89	25.71	22.8	17.83
F095	14.37	16.5	16.57	3.07	3.49	3.65	2.89	3.74	3.17	9.02	10.17	10.62	6.6	6.59	5.81	23.69	22.56	18.59
F096	15.85	16.11	16.48	3.22	3.21	3.53	3.3	3.26	3.37	8.99	9.04	9.56	5.91	6.15	5.01	22.39	19.29	17.84
F097	16.02	17.69	17.99	2.92	3.35	3.12	2.17	2.98	2.55	7.84	9.83	9.49	12.28	9	8.1	38.25	25	23.68
F098	18.02	20.1	22.11	3.6	4.2	4.46	2.52	2.92	3.36	9.74	11.65	12.23	5.29	3.64	3.93	25.25	22	20.4
F099	16.21	17.25	19.01	3.37	3.29	3.65	2.79	2.78	2.99	9.92	9.89	10.83	5.65	4.19	5.66	21.33	19.33	16.33
F100	16.18	17.09	18.69	3.22	3.38	4.17	2.6	2.84	3.22	9.1	10.35	11.78	8.55	6.58	4.5	22.46	19.85	16.03
F101	13.48	14.29	16.35	3.29	3.62	4	2.81	2.71	2.94	7.33	9.57	9.66	6.45	4.6	4.46	15.75	14.83	13.93
F102	15.4	15.99	15.26	3.97	3.83	4.15	2.12	2.18	2.47	8.07	8.6	8.31	5.73	4.65	3.64	19.5	16.83	14.79
F103	12.49	13.95	13.86	2.56	2.73	2.65	2.13	2.18	2.15	6.63	7.14	6.75	5.6	4.11	4.2	18.21	17.76	16.4
F104	24.07	24.1	25.45	4.28	4.96	5.33	3.37	3.78	4.48	10.98	12.69	13.37	10.8	7.98	3.43	35.28	22.9	23.08
F105	15.78	16.38	17.44	3.62	3.81	3.98	3.38	3.23	3.49	9.47	9.8	9.94	8.3	6.15	6.3	25.68	21.15	22
F106	14.05	14.73	15.25	2.89	3.14	3.36	2.69	2.87	3.18	7.86	8.8	8.82	4.86	3.9	3.61	18.43	15.18	14.7
F107	16.05	17.17	17.52	3.97	4.4	4.54	3.7	4.38	4.28	9.81	11.13	11.04	5.93	4.06	4.3	21.6	17.38	17.15
F108	14.21	15.06	15.81	2.94	3.1	3.47	1.6	2.43	1.48	7.02	7.3	7.51	5.15	4.23	4.41	18.45	15.94	14.36
F109	14.97	14.48	15.97	3.26	2.91	3.28	2.71	2.35	2.64	8.96	9.13	9.21	7.74	6.26	5.64	25.7	19.43	19.91
F110	15.13	15.55	15.58	2.42	2.56	2.53	1.62	1.81	2.15	7.26	7.97	8.3	6.38	4.4	3.6	25.68	17.65	17.58
F111	15.99	17.35	17.51	3.16	3.28	3.5	2.5	2.84	2.78	9.28	9.96	9.96	7.34	5.18	4.6	20.76	17.65	15.46
F112	16	16.49	17.85	3.49	3.7	4.1	2.93	2.82	3.04	8.67	9.91	11	5.6	4.23	3.9	19.01	16.14	13.45
F113	20.86	22.01	24.01	4.29	4.52	5.05	3.44	3.43	3.69	11.94	12.73	13.85	6.13	4	3.04	26.48	19.78	19.03
F114	17.74	18.68	19.25	3.57	3.89	4.26	1.99	2.11	2.3	8.2	9.32	10.27	7.99	5.95	4.88	23.95	18.98	17.23
F115	17.31	18.24	19.16	3.81	4.07	4.64	3.54	3.68	4.03	10.65	11.54	12.12	5.83	4.15	4.46	23.21	19.24	17.15
F116	19.72	19.33	19.66	2.89	3	3.73	1.93	1.8	2.93	6.04	6.39	7.71	7.21	5.34	5.19	24.05	22.18	19.26
F117	16.78	17.48	17.87	3.25	3.33	3.41	3.03	3.47	3.22	9	9.46	9.25	6.75	5.85	4.99	25.18	23.54	20.46
F118	18.17	18.35	18.87	3.91	3.87	4.21	4.58	4.33	5.1	9.25	9.62	10.13	5.28	3.86	3.23	22.4	18.98	18.53
F119	14.6	16.13	16.74	3.15	3.65	3.91	2.83	3.49	3.6	9.24	9.04	9.45	5.73	3.87	4.1	20.23	16.29	14.55
F120	22.21	24.58	24.68	4.28	4.68	5.57	3.22	3.23	4.25	11.79	11.04	12.72	6.88	4.57	5.16	32.77	31.8	24.3
F121	18.8	19.16	20.41	3.42	3.93	4.13	3.13	3.56	3.51	10.05	10.28	11.27	8.4	5.47	3.79	23.76	17.58	16.38
F122	20.06	23.04	24.35	3.82	3.87	4.31	3.71	3.81	4.19	10.75	11.26	12.19	10.1	6.38	4.98	31.36	25.97	23.2
F123	16.37	23	17.42	3.53	3.64	4.02	3.14	3.12	3.02	8.26	8.74	9.55	10.25	6.41	3.5	23.61	18.39	16.28
F124	17.13	17.36	18.7	3.59	3.65	4.11	3.1	2.77	3.8	9.23	9.16	10.74	8.3	5.6	5.28	27.74	26.19	20.85
F125	15.9	16.57	18.54	3.28	3.32	3.83	2.03	2.12	2.47	7.42	7.51	8.33	9.78	5.93	2.42	23.92	19.54	17.13
F126	20.61	19.53	21.29	3.85	3.9	4.66	2.81	2.53	3.13	8.98	9.17	10.66	5.5	3.48	3.02	25.37	19.93	19
F127	16.73	16.83	17.68	3.39	3.82	4.12	1.8	1.99	2.12	8.63	8.22	8.95	7.75	5.36	3.62	22.93	19.81	17.38
F128	19.43	21.05	20.71	4.3	4.71	4.47	2.94	2.87	2.8	9.89	10.71	10.94	9.13	4.98	3.64	25.85	19.86	14.5
F129	18.73	16.74	16.06	3.54	3.64	3.75	2.99	2.81	3.06	9.59	10.14	9.44	7.2	5.54	3.96	29.1	23.7	21.6
F130	15.37	15.26	16.79	3.1	3.55	3.79	4.29	3.94	4.66	11.05	11.22	11.65	14.98	7.52	5.9	27.36	24.97	20.3
F131	19.45	19.14	18.72	3.2	3.39	3.48	1.7	1.74	1.8	7.16	7.16	7.37	6.65	4.57	3.62	25.8	18.28	18.23
F132	19.49	20.33	20.38	3.62	3.82	4.02	4.19	4.44	4.44	10.57	10.65	10.82	12.7	8.66	5.39	27.17	21.06	18.05
F133	17.74	17.05	17.97	3.03	3.18	3.37	1.82	1.84	1.71	7.27	7.23	7.6	8.9	6.73	3.11	25.63	22.23	17.93
F134	14.43	15.62	16.9	3.13	3.53	3.7	4.6	4.79	5.26	9.96	9.54	10.11	9.58	4.45	4.24	19.66	15.86	14.88
F135	17.88	17.47	17.71	3.35	3.48	3.82	2.82	3.02	3.3	9.21	9.1	9.85	10.08	4.27	3.5	22.8	19.32	16.03
F136	14.31	15.26	16.52	2.83	3.24	3.75	3.55	3.98	4.35	8.84	9.13	9.58	12.63	6.99	4.68	21.87	18.28	15.85
F137	17.97	17.76	18.25	3.41	3.97	3.98	3.2	3.5	4.14	9.72	9.72	9.89	12.55	8	4.79	26.75	18.82	17.65
F138	19.51	20.61	21.39	3.5	3.73	4.77	3.4	2.94	3.95	11.84	11.39	11.5	9.25	4.02	3.57	25.7	18.68	16.93
F139	17.26	17.11	16.2	3.37	3.66	3.62	3.84	4.18	3.76	7.94	8.63	8.44	9.65	7.01	6.01	25.1	23.8	20.73
F140	15.73	17.87	19.08	3.35	3.82	4.16	2.01	2.19	2.81	8.86	9.86	10.38	7.58	5.04	3.64	16.69	15.83	13.98
F141	22.22	21.19	20.97	4.33	4.44	4.31	2.56	2.4	2.16	9.58	9.59	9.01	7	4.79	4.79	28.09	23.41	19.88
F142	16.85	20.95	22.96	3.51	3.98	4.74	2.25	2.28	2.45	7.88	7.79	8.65	8.1	5.58	5.55	20.82	20.11	18.85
F143	17.78	16.47	17.16	4.65	3.32	3.66	1.3	1.33	1.32	6.77	6.51	6.74	5.13	4.72	4.12	20.82	17.28	14
F144	16.52	19.7	21.41	3.85	4.1	4.2	2.43	2.72	2.68	9.01	8.91	9.16	8.85	6.18	5.55	24.73	21.74	17.45
F145	18.64	19.36	19.35	3.29	3.51	3.67	1.86	1.9	2.02	7.33	7.1	7.49	10.58	7.9	5.46	23.43	19.61	15.05
F146	15.28	17.52	20.23	3.04	3.4	3.53	1.73	2	1.94	7.12	7.55	7.36	10.5	5.79	4.17	19.81	16.35	14.85
F147	25.91	24.57	23.79	4.68	4.89	5	3.02	3.2	3.3	11.06	11.62	12.09	7.9	4.7	3.85	31.49	23.23	23.88
F148	16.81	18.71	18.73	3.22	3.41	3.22	2.25	2.39	2.36	8.22	8.29	7.93	8.75	5.98	5.21	22.84	18.05	16
F149	21.79	22.57	22.28	4.05	3.89	4.2	2.7	2.51	2.62	8.02	8.21	8.85	5.8	4.15	3.39	24.88	19.81	14.13
F150	13.18	14.26	14.63	3.32	3.35	3.32	2.87	3.13	3.08	8.13	8.07	7.8	11.58	7.05	6.11	20.86	18.05	15.68
F151	18.71	18.63	19.45	3.71	3.77	4.09	2.31	2.16	2.55	8.92	8.85	9.65	8.55	5.47	4.56	22.01	19.07	17.33
F152	17.02	17.59	18.98	3.98	4.06	4.58	2.48	2.69	3.2	10.47	10.38	10.64	8.95	4.19	4.38	22.27	19.66	17.53
F153	17.89	18.38	20.1	3.05	3.04	3.65	1.06	1.07	1.2	5.2	5.31	6.39	13.13	8.25	8.41	26.95	21.53	19.73
F154	12.4	15.07	15.54	2.88	3.4	4.06	2.3	2.79	2.5	6.99	7.73	7.26	8.48	4.02	3.94	16.87	11.65	13.18
F155	14.94	15.51	15.71	2.86	3.05	2.93	2.58	2.76	2.54	7.39	7.67	7.42	9.15	4.42	4.4	23.83	19.59	18.13
F156	15.35	17.42	19.72	3.31	3.93	4.11	2.06	2.28	2.43	8.82	8.8	9.38	10.35	6.41	5.25	18.69	17.58	18.25
F157	22.17	22.2	22.79	4.35	4.78	4.31	3.82	4.27	3.68	10.27	12.46	11.56	9.15	7.95	5.99	25.56	21.62	21.63
F158	18.2	21.05	21.86	3.31	3.94	4.34	2.57	2.83	2.73	9.21	10.63	11.15	10.68	5.19	5.16	24.4	20.76	18.65
F159	18.39	18.87	19.78	3.05	3.26	3.29	1.33	1.24	1.12	6.24	6.26	6.02	7.78	5.64	5.78	23.5	17.78	17.7
F160	13.3	15.14	15.7	2.59	3.16	3	1.66	1.72	1.78	6.17	6.34	5.94	9.08	5.94	4.65	17.17	16.58	12.93
F161	13.79	14.22	14.44	2.42	2.67	2.65	1.9	2.05	2.03	4.92	5.31	5.1	12.93	8.4	7.21	24.88	24.25	21.65
F162	14.43	15.39	16.73	2.7	2.97	3.42	2.08	2.08	2.15	7.51	7.56	8.82	11.08	7.72	4.77	21.83	17.55	15.7
F163	16.25	16.83	17.48	3.21	3.19	3.55	3.43	4.05	4.28	10.9	10.41	10.57	12.6	7.57	5.85	27.91	22.23	20.25
F164	17.99	19.03	19.83	3.7	3.9	4.39	2.34	2.64	2.68	10.41	10.16	10.54	8	4.19	3.07	17.59	17.03	17.08
F165	19.24	19.01	18.69	3.7	3.69	4.15	3.33	3.53	3.56	10.93	10.91	11.16	10.53	6.32	3.89	27.14	21.15	19.68
F166	17.8	22.45	21.75	3.74	4.3	4.38	2.83	3.22	3.07	10.59	11.49	10.85	9.88	5.28	4.17	23.67	24	23.18
F167	17.49	18.66	19.43	3.43	4.03	3.85	2.82	3.25	2.73	8.88	8.9	8.68	11.4	6.15	4.79	28.9	22.78	20.83
F168	18.29	20.39	20.01	4.3	4.68	4.76	3.07	3.14	3.19	10.79	11.06	11.34	8.38	4.94	4.38	18.12	16.67	16.4
F169	17.65	17	17.3	3.36	3.44	3.67	2.39	2.35	2.88	9.03	9.03	9.68	10.1	6.03	5.94	23.43	22.23	19.25
F170	16.65	17.37	19.26	3.23	3.68	3.76	1.25	1.38	1.45	5.68	5.64	5.87	5.78	4.12	2.72	15.72	12.35	15.18
F171	19.68	22.02	22.92	4.99	5.35	5.48	2.62	3.27	2.93	13.02	12.87	12.18	10.22	6.68	3.08	28.99	20.46	18.92
F172	21.96	23.85	24.81	4.24	4.86	5.25	2.34	2.35	2.68	11.3	11.82	11.54	6.53	4.55	4.86	27.34	22.89	21.4
F173	18.31	19.48	18.84	2.85	3.21	2.99	0.86	0.93	1.33	5.36	5.29	5.03	6.4	4.12	3.69	20.05	16.72	16.7
F174	15.71	16.81	16.58	3.25	3.52	3.82	2.64	2.86	3.1	10.17	8.99	9.48	11	6.35	4.7	23.56	20.15	19.25
F175	16.25	15.75	17.07	2.93	3.42	3.84	2.21	2.57	2.81	9.07	8.5	9.49	9.8	4.96	4.77	24.25	17.87	15.65
F176	14.57	16.48	15.95	3.2	3.73	3.58	3.58	4.52	3.75	10.5	10.43	9.56	9.05	5.26	5.67	23.81	19.09	18.93
F177	14.85	16.57	16.58	2.83	3.4	3.59	1.8	2.15	2.15	7.83	8.23	8.07	6.3	6.13	6.38	20.97	20.22	19.93
F178	18.29	18.01	18.84	3.6	4.25	4.37	2.7	2.84	2.5	9.87	9.44	9.32	7.28	5.86	3.87	23.63	21.53	21.43
F179	14.67	15.36	15.49	2.64	2.84	2.89	1.2	1.33	1.4	5.8	5.37	5.42	6.38	4.57	3.78	17.64	15.9	14.9
F180	20.32	21.43	22.53	3.4	3.97	4.02	2.55	2.78	2.99	9.58	9.6	9.94	9.9	4.77	4.54	29.49	22.37	20.65
F181	17.99	18.61	20.65	3.82	4.03	4.65	2.36	2.33	2.61	9.99	10.11	10.2	6.55	4.68	3.87	21.63	18.43	18.28
F182	20.47	23.18	22.54	3.7	4.36	4.42	2.21	2.96	3.22	10.85	11.63	11.24	9.7	3.4	3.29	23.06	19.66	17.03
F183	15.42	16.24	16.71	2.98	3.43	3.63	2.05	2.29	2.41	7.77	7.91	8.05	7.13	4.36	3.62	19.57	16.08	16.35
F184	17.79	19.97	20.85	3.48	3.54	3.75	1.54	1.61	1.61	7.96	7.93	8.18	11.7	7.59	6.87	25.45	22.75	22.8
F185	17.67	18.17	19.31	3.43	3.52	4.26	2.08	2.17	2.33	7.16	7.83	8.72	5.63	5.43	4.17	23.98	18.5	18.2
F186	13.69	14.25	16.19	2.95	3.51	3.63	1.51	1.78	1.96	5.79	6.81	7.12	11.15	7.37	5.25	25.37	23.14	18.55
F187	20.93	22.69	25.64	4.6	4.71	5.6	3.95	4.19	4.81	11.74	11.61	13.22	11.2	5.81	4.61	31.36	26.89	26.1
F188	15.29	14.96	15.94	2.87	3.54	3.87	2.56	3.42	3.28	8.36	9.23	9.92	9.73	5.81	6.43	18.84	18.21	16.08
F189	17.18	16.67	18.25	3.02	3.06	2.79	1.26	1.08	1.07	7.26	4.62	4.31	6.45	3.98	3.85	19.99	16.87	16.08
F190	14.82	14.1	16.22	2.5	2.62	2.61	1.14	0.99	1.2	4.59	4.37	5.04	7.95	6.03	4.84	16.25	15.02	14.78
F191	19.29	19.52	19.98	3.45	3.69	4.21	2.2	2.1	2.23	7.6	8	8.83	8.13	5.39	6.27	19.33	17.67	15.1
F192	19.18	19.54	20.3	3.79	4.03	4.3	2.33	2.51	2.49	7.75	7.52	8.13	16.17	10.36	6.17	29.21	23.66	19.2
F193	16.78	16.93	18.18	3.24	3.42	4.27	2.12	2.32	2.52	8.79	8.49	9.32	10.2	7.83	5.69	25.12	18.05	18.53
F194	14	16.17	17.33	2.99	3.56	3.98	3.33	3.79	4.38	8.51	8.97	10.4	8.98	5.26	4.42	18.23	15.72	13.65
F195	20.41	21.3	23.32	3.31	3.79	4.07	1.71	1.66	1.69	8.52	8.23	8.44	7.82	3.86	2.59	38.13	22.9	20.37
F196	18.4	19.4	20.79	3.22	3.86	4.52	2.06	2.25	2.67	8.19	8.82	9.88	8.1	4.27	3.87	18.6	16.04	15.95
F197	21	21.03	23.06	3.58	3.76	4.35	4.03	3.93	4.62	10.82	10.53	12.54	5.08	3.5	4.19	28.46	25.44	24.2
F198	15.4	16.3	17.78	3.15	3.14	3.55	3.74	3.78	4.47	9.25	9.34	10.96	6.55	4.34	3.43	20.29	18.77	19.1
F199	14.48	16.15	17.62	2.23	2.6	3.04	0.86	0.94	0.96	4.51	4.2	5.34	5.25	5.06	4.7	17.15	16.38	15.2
F200	14.63	14.89	16.71	3.25	3.25	3.58	2.73	2.96	3.27	9.86	9.71	9.4	8.75	5.26	6.73	28.55	23.7	19.8
F201	15.7	17.18	17.57	3.04	3.38	3.9	3.4	3.92	4.45	9.4	9.31	10.67	5.63	3.85	2.72	17.92	16.2	15.7
F202	22.16	22.56	24.2	4.12	4.21	5.59	1.81	1.94	2.39	7.54	8.97	9.69	11.73	6.09	3.66	23.39	20.24	20.3
F203	18.12	20.72	20.21	3.07	3.69	3.99	1.95	2.15	2.17	7	6.81	7.3	9.35	4.98	3.99	19.72	19.34	18.5
F204	12.11	11.76	12.58	2.1	2.16	2.53	1.28	1.22	1.3	4.08	4.11	4.39	6	4.27	3.53	17.33	14.77	11.68
F205	16.21	16.48	16.76	3.31	3.34	3.69	2.87	2.89	3.32	8.94	8.29	9.67	7.08	4.89	3.23	19.94	17.35	16.8
F206	20.58	20.61	20.37	4.22	4.36	4.35	3.3	3.15	3.07	8.01	8.65	9.73	11.53	7.69	6.11	27.74	20.04	20.5
F207	15.1	14.72	15.35	2.87	3.24	2.98	1.46	1.76	1.73	4.68	4.99	5.22	5.65	4.77	3.29	19.46	16.31	15.45
F208	19.78	20.89	19.96	3.51	3.74	4.19	2.7	3.13	3.23	8.41	8.75	9.91	11.53	9.7	7.97	22.8	21.49	18.43
F209	20.35	21.56	21.45	3.45	3.83	3.66	3.38	3.57	2.92	9.09	10.34	10.74	9.08	4.59	4.47	25.34	21.73	17.1
F210	18.49	18.76	18.67	3.26	3.65	3.41	3.08	3.48	3.3	9.04	9.3	9.17	18.38	11.76	8.13	27.85	23.47	22.15
F211	18.18	18.02	18.49	3.05	3.41	3.65	3.81	3.34	3.32	8.11	8.41	8.59	8.6	6.54	4.88	22.66	20.85	18.73
F212	15.4	16.18	15.86	2.96	3.04	3.17	1.15	1.29	1.31	5.41	5.57	5.57	9.63	4.57	4.08	19.7	16.06	12.75
F213	15.21	15.87	16.48	3.05	2.97	3.09	3.71	3.28	3.48	7.45	7.78	7.66	7.95	5.15	5.81	18.93	16.74	14.78
Nipponbare	19.52	21.6467	22.5933	2.88889	3.47444	3.84	1.84	1.86	1.89333	8.13333	8.56	8.61	7.6	5.03	4.65	22.4	19.2	16.2
9311	16.3267	18.2333	18.5933	3.53667	4.06556	4.38667	2.63333	3.08	3.67333	11	11.1733	11.4333	10.3	7.13	6.04	24.7	23.5	19.8
